# Supplementary material for: CDMPred: a tool for predicting cancer driver missense mutations with high-quality passenger mutations
Source: PeerJ. 2024 Sep 6;12:e17991. doi: 10.7717/peerj.17991 (PMC11382650; doi:10.7717/peerj.17991)
Supplement: File S1 — Raw data for training the cancer driver missense mutation predictor. [file peerj-12-17991-s007.xlsx]

## Sheet: Positive samples
Transcript_ID	AA_Change
ENST00000301067	p.R466C
ENST00000301067	p.R466H
ENST00000381652	p.C618F
ENST00000381652	p.C618R
ENST00000381652	p.C616Y
ENST00000381652	p.D620G
ENST00000381652	p.K607N
ENST00000381652	p.L609S
ENST00000381652	p.L611V
ENST00000381652	p.V617F
ENST00000381652	p.H608Y
ENST00000381652	p.H606Q
ENST00000381652	p.D620E
ENST00000381652	p.L611S
ENST00000381652	p.V617I
ENST00000288602	p.D587A
ENST00000288602	p.E611G
ENST00000288602	p.R462I
ENST00000288602	p.G466A
ENST00000288602	p.S467P
ENST00000288602	p.S129L
ENST00000288602	p.G466E
ENST00000288602	p.M53T
ENST00000288602	p.E586K
ENST00000288602	p.G455E
ENST00000288602	p.Q257H
ENST00000288602	p.A598V
ENST00000288602	p.I326T
ENST00000288602	p.G606V
ENST00000288602	p.F595S
ENST00000288602	p.V590A
ENST00000288602	p.K601R
ENST00000288602	p.F610L
ENST00000288602	p.H298Y
ENST00000288602	p.V459L
ENST00000288602	p.L588P
ENST00000288602	p.R444W
ENST00000288602	p.K601E
ENST00000288602	p.S607P
ENST00000288602	p.L597Q
ENST00000288602	p.D594G
ENST00000288602	p.T440A
ENST00000288602	p.S102F
ENST00000288602	p.N581S
ENST00000288602	p.L485S
ENST00000288602	p.F610S
ENST00000288602	p.A598T
ENST00000288602	p.W604S
ENST00000288602	p.W604R
ENST00000288602	p.S602Y
ENST00000288602	p.G464E
ENST00000288602	p.L537S
ENST00000288602	p.T589I
ENST00000288602	p.G442S
ENST00000288602	p.S616F
ENST00000288602	p.D587G
ENST00000288602	p.K439T
ENST00000288602	p.I582M
ENST00000288602	p.L584P
ENST00000288602	p.I463S
ENST00000288602	p.F357S
ENST00000288602	p.F595L
ENST00000288602	p.K591R
ENST00000288602	p.I463V
ENST00000288602	p.D594N
ENST00000288602	p.K601N
ENST00000288602	p.G455R
ENST00000288602	p.T589A
ENST00000288602	p.H608L
ENST00000288602	p.S605R
ENST00000288602	p.G464V
ENST00000288602	p.D587N
ENST00000288602	p.V600E
ENST00000288602	p.K601Q
ENST00000288602	p.R462G
ENST00000288602	p.I300V
ENST00000288602	p.L597V
ENST00000288602	p.R603L
ENST00000288602	p.Q201H
ENST00000288602	p.V459A
ENST00000288602	p.I326V
ENST00000288602	p.W604G
ENST00000288602	p.Q609R
ENST00000288602	p.G464R
ENST00000288602	p.D587E
ENST00000288602	p.K601I
ENST00000288602	p.T440P
ENST00000288602	p.S365L
ENST00000288602	p.N581Y
ENST00000288602	p.Y198H
ENST00000288602	p.R444L
ENST00000288602	p.H574N
ENST00000288602	p.S614P
ENST00000288602	p.D594H
ENST00000288602	p.Q456R
ENST00000288602	p.S364L
ENST00000288602	p.T529A
ENST00000288602	p.V600A
ENST00000288602	p.D594V
ENST00000288602	p.L505H
ENST00000288602	p.V600M
ENST00000288602	p.D479Y
ENST00000288602	p.I592M
ENST00000288602	p.G466R
ENST00000288602	p.G593S
ENST00000288602	p.G593C
ENST00000288602	p.K205Q
ENST00000288602	p.H574Q
ENST00000288602	p.G596S
ENST00000288602	p.R444Q
ENST00000288602	p.G596R
ENST00000288602	p.S605G
ENST00000288602	p.G606A
ENST00000288602	p.V590I
ENST00000288602	p.R462K
ENST00000288602	p.G606E
ENST00000288602	p.P367R
ENST00000288602	p.I457T
ENST00000288602	p.F247L
ENST00000288602	p.L597R
ENST00000288602	p.G258V
ENST00000288602	p.F583S
ENST00000288602	p.Q612E
ENST00000288602	p.V600L
ENST00000288602	p.K439Q
ENST00000288602	p.T310I
ENST00000288602	p.L584F
ENST00000288602	p.V600G
ENST00000288602	p.D594E
ENST00000288602	p.G606R
ENST00000288602	p.T599I
ENST00000288602	p.N581I
ENST00000288602	p.K591E
ENST00000288602	p.W531C
ENST00000288602	p.E611D
ENST00000288602	p.G596D
ENST00000288602	p.R146W
ENST00000288602	p.G466V
ENST00000288602	p.R443T
ENST00000288602	p.I592V
ENST00000288602	p.S605N
ENST00000288602	p.L588R
ENST00000288602	p.G593D
ENST00000288602	p.A184T
ENST00000288602	p.H542Y
ENST00000288602	p.S616P
ENST00000288602	p.W450L
ENST00000288602	p.G615R
ENST00000288602	p.H608R
ENST00000288602	p.L597P
ENST00000288602	p.A305V
ENST00000288602	p.P453T
ENST00000288602	p.L485F
ENST00000288602	p.H539P
ENST00000358273	p.S858Y
ENST00000358273	p.L161F
ENST00000358273	p.A887T
ENST00000358273	p.R873C
ENST00000358273	p.I878T
ENST00000358273	p.E872K
ENST00000358273	p.S856N
ENST00000358273	p.D176E
ENST00000307102	p.P124L
ENST00000307102	p.C121S
ENST00000307102	p.R108Q
ENST00000307102	p.V127M
ENST00000307102	p.K57E
ENST00000307102	p.D67N
ENST00000307102	p.G128V
ENST00000307102	p.F129L
ENST00000307102	p.A132V
ENST00000307102	p.R49L
ENST00000307102	p.F53S
ENST00000307102	p.F53C
ENST00000307102	p.G128D
ENST00000307102	p.P124Q
ENST00000307102	p.Q56P
ENST00000307102	p.R47Q
ENST00000307102	p.K57N
ENST00000307102	p.P124S
ENST00000307102	p.N382H
ENST00000307102	p.P387S
ENST00000307102	p.L115P
ENST00000307102	p.I111S
ENST00000307102	p.Y134C
ENST00000372470	p.W515L
ENST00000372470	p.V501L
ENST00000372470	p.A506T
ENST00000372470	p.S505G
ENST00000372470	p.G509C
ENST00000372470	p.V507I
ENST00000372470	p.L510P
ENST00000372470	p.S505C
ENST00000372470	p.V501A
ENST00000372470	p.A519T
ENST00000372470	p.A519V
ENST00000372470	p.R514K
ENST00000372470	p.R514M
ENST00000372470	p.S505N
ENST00000372470	p.W515S
ENST00000372470	p.W515R
ENST00000261769	p.S559N
ENST00000261769	p.D552N
ENST00000261769	p.T560R
ENST00000261769	p.G571S
ENST00000234420	p.V474A
ENST00000234420	p.G1139C
ENST00000234420	p.V1056M
ENST00000234420	p.R58S
ENST00000234420	p.I258T
ENST00000234420	p.E796K
ENST00000234420	p.R383G
ENST00000234420	p.P233S
ENST00000234420	p.G670V
ENST00000234420	p.S315P
ENST00000234420	p.A175T
ENST00000234420	p.L979V
ENST00000234420	p.R1076H
ENST00000234420	p.F726L
ENST00000234420	p.D1171V
ENST00000234420	p.P42S
ENST00000234420	p.V1056A
ENST00000234420	p.Y397C
ENST00000234420	p.P768H
ENST00000234420	p.V509A
ENST00000234420	p.K692N
ENST00000234420	p.R732Q
ENST00000234420	p.I1357N
ENST00000234420	p.E201Q
ENST00000234420	p.R1095H
ENST00000234420	p.G770V
ENST00000234420	p.T757I
ENST00000234420	p.L373P
ENST00000234420	p.D197H
ENST00000234420	p.M1156K
ENST00000234420	p.F265C
ENST00000234420	p.G141S
ENST00000234420	p.S1049F
ENST00000234420	p.A297T
ENST00000234420	p.V509G
ENST00000234420	p.G141D
ENST00000234420	p.D358N
ENST00000234420	p.K187E
ENST00000234420	p.K187T
ENST00000234420	p.R361H
ENST00000234420	p.E487D
ENST00000234420	p.E198A
ENST00000234420	p.L109V
ENST00000234420	p.V480L
ENST00000234420	p.L681F
ENST00000234420	p.S315F
ENST00000234420	p.A1151V
ENST00000234420	p.D197G
ENST00000234420	p.E198G
ENST00000234420	p.Y1159C
ENST00000234420	p.R495L
ENST00000234420	p.P623L
ENST00000234420	p.C1165R
ENST00000234420	p.G624S
ENST00000234420	p.R495Q
ENST00000234420	p.M875I
ENST00000234420	p.L1332S
ENST00000234420	p.L423I
ENST00000234420	p.A457V
ENST00000234420	p.G971E
ENST00000234420	p.E198K
ENST00000234420	p.L893Q
ENST00000234420	p.R644M
ENST00000234420	p.S360N
ENST00000234420	p.S532A
ENST00000234420	p.R644S
ENST00000234420	p.D197N
ENST00000234420	p.R1334W
ENST00000234420	p.R644W
ENST00000234420	p.H130N
ENST00000234420	p.D390N
ENST00000234420	p.S314I
ENST00000234420	p.Q698E
ENST00000234420	p.A342S
ENST00000234420	p.P1082L
ENST00000234420	p.A457D
ENST00000234420	p.K185T
ENST00000234420	p.A1204E
ENST00000234420	p.A1303T
ENST00000234420	p.E484K
ENST00000234420	p.K247I
ENST00000234420	p.F689V
ENST00000234420	p.R497T
ENST00000234420	p.C615F
ENST00000263967	p.S158T
ENST00000263967	p.L1026P
ENST00000263967	p.A1046V
ENST00000263967	p.E418G
ENST00000263967	p.Q1014R
ENST00000263967	p.S1015P
ENST00000263967	p.A1046E
ENST00000263967	p.R398H
ENST00000263967	p.T1025N
ENST00000263967	p.P17S
ENST00000263967	p.G1009R
ENST00000263967	p.R38C
ENST00000263967	p.M1040T
ENST00000263967	p.L1006P
ENST00000263967	p.F1016L
ENST00000263967	p.A1035V
ENST00000263967	p.A1020V
ENST00000263967	p.G106V
ENST00000263967	p.P1011L
ENST00000263967	p.G12D
ENST00000263967	p.E970K
ENST00000263967	p.E600K
ENST00000263967	p.G1007R
ENST00000263967	p.Y1038C
ENST00000263967	p.E1037G
ENST00000263967	p.G1049C
ENST00000263967	p.S1015F
ENST00000263967	p.T1052I
ENST00000263967	p.R108H
ENST00000263967	p.P18Q
ENST00000263967	p.D1017E
ENST00000263967	p.Q75K
ENST00000263967	p.T1052A
ENST00000263967	p.M1004I
ENST00000263967	p.R115L
ENST00000263967	p.E365G
ENST00000263967	p.M1043V
ENST00000263967	p.Y1021C
ENST00000263967	p.E365V
ENST00000263967	p.R93Q
ENST00000263967	p.D1017H
ENST00000263967	p.G364R
ENST00000263967	p.L1026I
ENST00000263967	p.L766F
ENST00000263967	p.P366R
ENST00000263967	p.E1012G
ENST00000263967	p.T1031I
ENST00000263967	p.C378Y
ENST00000263967	p.R777M
ENST00000263967	p.K111R
ENST00000263967	p.E110K
ENST00000263967	p.R93W
ENST00000263967	p.G1050D
ENST00000263967	p.C420R
ENST00000263967	p.H1048D
ENST00000263967	p.R38G
ENST00000263967	p.R357Q
ENST00000263967	p.D133V
ENST00000263967	p.H1047Q
ENST00000263967	p.G1049R
ENST00000263967	p.S1015Y
ENST00000263967	p.I1019V
ENST00000263967	p.I1019F
ENST00000263967	p.P1011S
ENST00000263967	p.E39K
ENST00000263967	p.K1024R
ENST00000263967	p.I13T
ENST00000263967	p.A1020T
ENST00000263967	p.R38S
ENST00000263967	p.G359R
ENST00000263967	p.R357L
ENST00000263967	p.R19K
ENST00000263967	p.R1023Q
ENST00000263967	p.L1006F
ENST00000263967	p.N1044D
ENST00000263967	p.R1023L
ENST00000263967	p.C407W
ENST00000263967	p.C901Y
ENST00000263967	p.D1017G
ENST00000263967	p.R115P
ENST00000263967	p.S405Y
ENST00000263967	p.I391M
ENST00000263967	p.M1040V
ENST00000263967	p.I20M
ENST00000263967	p.Q60K
ENST00000263967	p.K111E
ENST00000263967	p.D1029E
ENST00000263967	p.W1051R
ENST00000263967	p.P421L
ENST00000263967	p.E1012K
ENST00000263967	p.N1044S
ENST00000263967	p.G1049S
ENST00000263967	p.D1045G
ENST00000263967	p.P134S
ENST00000263967	p.K1041N
ENST00000263967	p.S405P
ENST00000263967	p.H1048Y
ENST00000263967	p.Q60R
ENST00000263967	p.G106A
ENST00000263967	p.P134L
ENST00000263967	p.Y1021N
ENST00000263967	p.L1001I
ENST00000263967	p.H1047R
ENST00000263967	p.M1004T
ENST00000263967	p.P18L
ENST00000263967	p.D1056G
ENST00000263967	p.R93L
ENST00000263967	p.R108P
ENST00000263967	p.R38H
ENST00000263967	p.E707K
ENST00000263967	p.F614I
ENST00000263967	p.D1017V
ENST00000263967	p.D1018N
ENST00000263967	p.C604R
ENST00000263967	p.S1008F
ENST00000263967	p.N107S
ENST00000263967	p.H1047Y
ENST00000263967	p.E1037K
ENST00000263967	p.R693H
ENST00000263967	p.H419N
ENST00000263967	p.L1001H
ENST00000263967	p.I1019T
ENST00000263967	p.H1048R
ENST00000263967	p.H1047P
ENST00000263967	p.H1048N
ENST00000263967	p.H1048L
ENST00000263967	p.H1047L
ENST00000263967	p.E39G
ENST00000263967	p.M1040L
ENST00000263967	p.G1049D
ENST00000263967	p.S629C
ENST00000263967	p.Q1033R
ENST00000263967	p.M1005V
ENST00000263967	p.T1053I
ENST00000263967	p.S1008P
ENST00000263967	p.F1039L
ENST00000263967	p.M1004V
ENST00000263967	p.S158L
ENST00000263967	p.F1039Y
ENST00000263967	p.H1048Q
ENST00000263967	p.C378F
ENST00000263967	p.D1029Y
ENST00000263967	p.E418K
ENST00000263967	p.Q137L
ENST00000263967	p.M1010I
ENST00000263967	p.K1030E
ENST00000263967	p.I31M
ENST00000263967	p.F909L
ENST00000263967	p.N1044K
ENST00000263967	p.H701P
ENST00000263967	p.D1045N
ENST00000263967	p.C378R
ENST00000263967	p.T1025S
ENST00000263967	p.S1008C
ENST00000263967	p.G1007D
ENST00000263967	p.K1041R
ENST00000263967	p.N1044Y
ENST00000263967	p.C407R
ENST00000263967	p.Q75E
ENST00000263967	p.Y1021F
ENST00000263967	p.G1050S
ENST00000263967	p.G364A
ENST00000263967	p.C901R
ENST00000263967	p.A1035T
ENST00000263967	p.E39V
ENST00000263967	p.M1043T
ENST00000263967	p.A222V
ENST00000263967	p.C901F
ENST00000263967	p.P104L
ENST00000263967	p.T1052K
ENST00000263967	p.I143V
ENST00000263967	p.P104R
ENST00000263967	p.F909S
ENST00000263967	p.G106R
ENST00000263967	p.G1009E
ENST00000263967	p.A1046T
ENST00000263967	p.P17L
ENST00000263967	p.K111N
ENST00000263967	p.I112V
ENST00000263967	p.S405F
ENST00000263967	p.D1029H
ENST00000263967	p.K1041E
ENST00000263967	p.I31V
ENST00000263967	p.T1025A
ENST00000263967	p.D1018G
ENST00000263967	p.L1036S
ENST00000263967	p.T1031A
ENST00000263967	p.T1025I
ENST00000263967	p.Y1038H
ENST00000263967	p.A1027V
ENST00000263967	p.M1040I
ENST00000263967	p.H701R
ENST00000263967	p.L699M
ENST00000263967	p.S1003P
ENST00000263967	p.Y1021H
ENST00000263967	p.M1V
ENST00000263967	p.E1034G
ENST00000263967	p.M1043I
ENST00000263967	p.H160N
ENST00000263967	p.E365K
ENST00000263967	p.D1056N
ENST00000263967	p.I112N
ENST00000263967	p.G1049A
ENST00000277541	p.P2271S
ENST00000277541	p.D1609V
ENST00000277541	p.R1608S
ENST00000277541	p.Y1619N
ENST00000277541	p.H1601L
ENST00000277541	p.V1599G
ENST00000277541	p.R1594Q
ENST00000277541	p.I1616N
ENST00000277541	p.L1596H
ENST00000277541	p.A1610T
ENST00000277541	p.F1592L
ENST00000277541	p.Q1614K
ENST00000277541	p.L1600P
ENST00000277541	p.S836N
ENST00000277541	p.H1601P
ENST00000277541	p.V1605G
ENST00000277541	p.I1616V
ENST00000277541	p.L1593P
ENST00000277541	p.E1623K
ENST00000277541	p.S1597I
ENST00000277541	p.V1604G
ENST00000277541	p.A2279V
ENST00000277541	p.D1609Y
ENST00000277541	p.F1592C
ENST00000277541	p.R1598P
ENST00000277541	p.L1600Q
ENST00000277541	p.F1592S
ENST00000275493	p.E734K
ENST00000275493	p.V845M
ENST00000275493	p.V897I
ENST00000275493	p.V765M
ENST00000275493	p.K745R
ENST00000275493	p.I715S
ENST00000275493	p.I740T
ENST00000275493	p.L707S
ENST00000275493	p.V765G
ENST00000275493	p.I759N
ENST00000275493	p.P848R
ENST00000275493	p.Y764H
ENST00000275493	p.P694L
ENST00000275493	p.E709V
ENST00000275493	p.L838P
ENST00000275493	p.G721C
ENST00000275493	p.L861R
ENST00000275493	p.T638M
ENST00000275493	p.G796V
ENST00000275493	p.G779C
ENST00000275493	p.T847K
ENST00000275493	p.G857E
ENST00000275493	p.S752Y
ENST00000275493	p.I91V
ENST00000275493	p.D46N
ENST00000275493	p.F856Y
ENST00000275493	p.D256A
ENST00000275493	p.A722V
ENST00000275493	p.A864E
ENST00000275493	p.V292L
ENST00000275493	p.A859T
ENST00000275493	p.S784Y
ENST00000275493	p.S784P
ENST00000275493	p.V834L
ENST00000275493	p.I732T
ENST00000275493	p.P733L
ENST00000275493	p.P741L
ENST00000275493	p.V689M
ENST00000275493	p.L858R
ENST00000275493	p.V802I
ENST00000275493	p.E884K
ENST00000275493	p.K754E
ENST00000275493	p.V774A
ENST00000275493	p.T725M
ENST00000275493	p.E602Q
ENST00000275493	p.T273N
ENST00000275493	p.E872K
ENST00000275493	p.T751I
ENST00000275493	p.R841K
ENST00000275493	p.Y801C
ENST00000275493	p.V769M
ENST00000275493	p.V536M
ENST00000275493	p.L692P
ENST00000275493	p.T725A
ENST00000275493	p.E734Q
ENST00000275493	p.L799R
ENST00000275493	p.D800G
ENST00000275493	p.E758D
ENST00000275493	p.G721S
ENST00000275493	p.E829K
ENST00000275493	p.A289T
ENST00000275493	p.R776H
ENST00000275493	p.G735S
ENST00000275493	p.K757M
ENST00000275493	p.I759V
ENST00000275493	p.L861V
ENST00000275493	p.N842H
ENST00000275493	p.E865K
ENST00000275493	p.Q105H
ENST00000275493	p.N756Y
ENST00000275493	p.G857V
ENST00000275493	p.E868D
ENST00000275493	p.G729R
ENST00000275493	p.R776S
ENST00000275493	p.K754I
ENST00000275493	p.D1012H
ENST00000275493	p.V786M
ENST00000275493	p.P596L
ENST00000275493	p.E697G
ENST00000275493	p.A839T
ENST00000275493	p.R836S
ENST00000275493	p.L798V
ENST00000275493	p.G796S
ENST00000275493	p.V843L
ENST00000275493	p.E829Q
ENST00000275493	p.C219G
ENST00000275493	p.S1153I
ENST00000275493	p.L861Q
ENST00000275493	p.V742I
ENST00000275493	p.D1168N
ENST00000275493	p.H805L
ENST00000275493	p.L833F
ENST00000275493	p.L688F
ENST00000275493	p.R705K
ENST00000275493	p.G863D
ENST00000275493	p.F856S
ENST00000275493	p.E884G
ENST00000275493	p.I706T
ENST00000275493	p.S720F
ENST00000275493	p.R803L
ENST00000275493	p.L798F
ENST00000275493	p.G873E
ENST00000275493	p.P694S
ENST00000275493	p.E709Q
ENST00000275493	p.K875R
ENST00000275493	p.V834M
ENST00000275493	p.N700S
ENST00000275493	p.H870N
ENST00000275493	p.D770N
ENST00000275493	p.V689L
ENST00000275493	p.D800N
ENST00000275493	p.T854I
ENST00000275493	p.R252H
ENST00000275493	p.E884Q
ENST00000275493	p.L844V
ENST00000275493	p.S784F
ENST00000275493	p.R705G
ENST00000275493	p.R748G
ENST00000275493	p.V769L
ENST00000275493	p.A767V
ENST00000275493	p.V60L
ENST00000275493	p.R836C
ENST00000275493	p.K860E
ENST00000275493	p.V851A
ENST00000275493	p.A755D
ENST00000275493	p.D855G
ENST00000275493	p.A750P
ENST00000275493	p.E282K
ENST00000275493	p.T263A
ENST00000275493	p.T785N
ENST00000275493	p.Q1164R
ENST00000275493	p.S768C
ENST00000275493	p.F712Y
ENST00000275493	p.K846E
ENST00000275493	p.L730F
ENST00000275493	p.F712L
ENST00000275493	p.A597P
ENST00000275493	p.A839V
ENST00000275493	p.R252S
ENST00000275493	p.V843I
ENST00000275493	p.I744M
ENST00000275493	p.K745M
ENST00000275493	p.E866D
ENST00000275493	p.L861P
ENST00000275493	p.L833V
ENST00000275493	p.G901V
ENST00000275493	p.Y801H
ENST00000275493	p.I715L
ENST00000275493	p.T854S
ENST00000275493	p.K754R
ENST00000275493	p.I91L
ENST00000275493	p.E866K
ENST00000275493	p.G719D
ENST00000275493	p.D256G
ENST00000275493	p.K708R
ENST00000275493	p.P753S
ENST00000275493	p.G810D
ENST00000275493	p.L833W
ENST00000275493	p.R252C
ENST00000275493	p.D807N
ENST00000275493	p.H773L
ENST00000275493	p.G917R
ENST00000275493	p.E709K
ENST00000275493	p.P699L
ENST00000275493	p.P699S
ENST00000275493	p.F723L
ENST00000275493	p.G721A
ENST00000275493	p.R748K
ENST00000275493	p.S720P
ENST00000275493	p.D837G
ENST00000275493	p.C251Y
ENST00000275493	p.L862P
ENST00000275493	p.L838V
ENST00000275493	p.K708M
ENST00000275493	p.L858P
ENST00000275493	p.C624F
ENST00000275493	p.T273A
ENST00000275493	p.E758G
ENST00000275493	p.T785I
ENST00000275493	p.A743P
ENST00000275493	p.Y727H
ENST00000275493	p.C775Y
ENST00000275493	p.H773R
ENST00000275493	p.L747S
ENST00000275493	p.A864T
ENST00000275493	p.H850N
ENST00000275493	p.D761Y
ENST00000275493	p.L777P
ENST00000275493	p.R108G
ENST00000275493	p.L907M
ENST00000275493	p.E734G
ENST00000275493	p.P772R
ENST00000275493	p.K209N
ENST00000275493	p.F712S
ENST00000275493	p.G719C
ENST00000275493	p.H850Y
ENST00000275493	p.L858V
ENST00000275493	p.G719V
ENST00000275493	p.L688P
ENST00000275493	p.A597T
ENST00000275493	p.A871T
ENST00000275493	p.Q1020H
ENST00000275493	p.M766V
ENST00000275493	p.C219R
ENST00000275493	p.E709A
ENST00000275493	p.D1012G
ENST00000275493	p.T847I
ENST00000275493	p.E690K
ENST00000275493	p.R748I
ENST00000275493	p.D855N
ENST00000275493	p.L828M
ENST00000275493	p.E872G
ENST00000275493	p.I744V
ENST00000275493	p.S768N
ENST00000275493	p.G719A
ENST00000275493	p.N700Y
ENST00000275493	p.H805Y
ENST00000275493	p.N756S
ENST00000275493	p.C636Y
ENST00000275493	p.E868K
ENST00000275493	p.E204K
ENST00000275493	p.T710A
ENST00000275493	p.G721D
ENST00000275493	p.V726M
ENST00000275493	p.G779S
ENST00000275493	p.S720T
ENST00000275493	p.P753L
ENST00000275493	p.V592I
ENST00000275493	p.A864V
ENST00000275493	p.A871E
ENST00000275493	p.L862Q
ENST00000275493	p.C620Y
ENST00000275493	p.L858Q
ENST00000275493	p.N700D
ENST00000275493	p.A743T
ENST00000275493	p.G863S
ENST00000275493	p.C231S
ENST00000275493	p.E868G
ENST00000275493	p.P794H
ENST00000275493	p.L777Q
ENST00000275493	p.R831H
ENST00000275493	p.P691S
ENST00000275493	p.P733T
ENST00000275493	p.F856L
ENST00000275493	p.V774M
ENST00000275493	p.G724S
ENST00000275493	p.A289D
ENST00000275493	p.I780S
ENST00000275493	p.T263P
ENST00000275493	p.R108K
ENST00000275493	p.A743S
ENST00000275493	p.S752P
ENST00000275493	p.G729E
ENST00000275493	p.T785A
ENST00000275493	p.F723S
ENST00000275493	p.I853T
ENST00000275493	p.T790M
ENST00000275493	p.R776G
ENST00000275493	p.Y727C
ENST00000275493	p.L862V
ENST00000275493	p.K716R
ENST00000275493	p.L782P
ENST00000275493	p.K708E
ENST00000275493	p.H835L
ENST00000275493	p.A702S
ENST00000275493	p.A289V
ENST00000275493	p.F968L
ENST00000275493	p.R831C
ENST00000275493	p.R832C
ENST00000275493	p.I744T
ENST00000275493	p.E734D
ENST00000275493	p.R222C
ENST00000275493	p.T783I
ENST00000275493	p.P741H
ENST00000275493	p.S768T
ENST00000275493	p.H893Y
ENST00000275493	p.L788F
ENST00000275493	p.P848L
ENST00000275493	p.E749G
ENST00000275493	p.P733S
ENST00000275493	p.V742A
ENST00000275493	p.H850R
ENST00000275493	p.V845A
ENST00000275493	p.K757N
ENST00000275493	p.S695G
ENST00000275493	p.P772S
ENST00000275493	p.G796D
ENST00000275493	p.G696R
ENST00000275493	p.G857R
ENST00000275493	p.V834A
ENST00000275493	p.I475V
ENST00000275493	p.S720Y
ENST00000275493	p.L718P
ENST00000275493	p.L858M
ENST00000275493	p.Q849R
ENST00000275493	p.D807E
ENST00000275493	p.E736G
ENST00000275493	p.D761N
ENST00000275493	p.N826S
ENST00000275493	p.W731R
ENST00000275493	p.E711V
ENST00000275493	p.L844P
ENST00000275493	p.C775R
ENST00000275493	p.V774L
ENST00000275493	p.H870Y
ENST00000275493	p.A702T
ENST00000275493	p.V802A
ENST00000275493	p.F795S
ENST00000275493	p.V802F
ENST00000275493	p.E804G
ENST00000275493	p.E711G
ENST00000275493	p.Y764S
ENST00000275493	p.A840T
ENST00000275493	p.K860I
ENST00000275493	p.V851I
ENST00000275493	p.G874S
ENST00000275493	p.G779D
ENST00000275493	p.L798H
ENST00000275493	p.C526S
ENST00000275493	p.E709G
ENST00000275493	p.Q1164K
ENST00000275493	p.C620W
ENST00000275493	p.E711K
ENST00000275493	p.E114K
ENST00000275493	p.G719S
ENST00000275493	p.S768G
ENST00000275493	p.T847A
ENST00000275493	p.H773Y
ENST00000275493	p.Q787R
ENST00000275493	p.E746K
ENST00000275493	p.V738G
ENST00000275493	p.V717A
ENST00000275493	p.G598V
ENST00000275493	p.R776C
ENST00000275493	p.L718V
ENST00000275493	p.D761G
ENST00000275493	p.H870R
ENST00000275493	p.N842D
ENST00000275493	p.A871V
ENST00000275493	p.G796A
ENST00000275493	p.T854A
ENST00000275493	p.K852N
ENST00000275493	p.S768I
ENST00000275493	p.D1152N
ENST00000275493	p.L703V
ENST00000275493	p.K846R
ENST00000275493	p.R832L
ENST00000275493	p.I759T
ENST00000275493	p.L703P
ENST00000275493	p.G810S
ENST00000275493	p.P699H
ENST00000275493	p.E746G
ENST00000275493	p.A871G
ENST00000275493	p.A859D
ENST00000275493	p.K806E
ENST00000275493	p.A722T
ENST00000275493	p.L703F
ENST00000275493	p.L792P
ENST00000275493	p.R832H
ENST00000275493	p.K261N
ENST00000275493	p.R836H
ENST00000275493	p.T790A
ENST00000275493	p.P772H
ENST00000275493	p.L633F
ENST00000275493	p.W731L
ENST00000275493	p.I780T
ENST00000275493	p.K714N
ENST00000275493	p.T785P
ENST00000275493	p.A698T
ENST00000275493	p.K806R
ENST00000275493	p.I91T
ENST00000275493	p.R831L
ENST00000275493	p.M766T
ENST00000275493	p.K757R
ENST00000275493	p.C797Y
ENST00000275493	p.E804K
ENST00000275493	p.E746V
ENST00000275493	p.G696E
ENST00000275493	p.G1022S
ENST00000275493	p.L798P
ENST00000275493	p.Y869C
ENST00000275493	p.L747V
ENST00000275493	p.H850D
ENST00000275493	p.E866G
ENST00000257555	p.R203C
ENST00000257555	p.K205Q
ENST00000257555	p.W206C
ENST00000257555	p.G207D
ENST00000257555	p.A501T
ENST00000257555	p.W206L
ENST00000257555	p.I27L
ENST00000257555	p.Q211P
ENST00000257555	p.R203L
ENST00000257555	p.S210F
ENST00000257555	p.P94H
ENST00000257555	p.L26Q
ENST00000257555	p.A98G
ENST00000249373	p.C390Y
ENST00000249373	p.V517L
ENST00000249373	p.R199W
ENST00000249373	p.S615P
ENST00000249373	p.T349I
ENST00000249373	p.P505R
ENST00000249373	p.A68V
ENST00000249373	p.P505L
ENST00000249373	p.K575M
ENST00000249373	p.L515F
ENST00000249373	p.R726Q
ENST00000249373	p.K575R
ENST00000249373	p.V210M
ENST00000249373	p.R562Q
ENST00000249373	p.R199Q
ENST00000249373	p.D506N
ENST00000249373	p.S533G
ENST00000249373	p.T349P
ENST00000249373	p.V404M
ENST00000249373	p.A235V
ENST00000249373	p.P634L
ENST00000249373	p.L412F
ENST00000249373	p.P641R
ENST00000249373	p.R547H
ENST00000249373	p.E578K
ENST00000249373	p.S533N
ENST00000249373	p.T640A
ENST00000249373	p.W535L
ENST00000249373	p.A601V
ENST00000249373	p.A324T
ENST00000249373	p.D209Y
ENST00000249373	p.S574C
ENST00000237289	p.D117G
ENST00000237289	p.N102S
ENST00000237289	p.R136C
ENST00000237289	p.L120W
ENST00000237289	p.R136H
ENST00000237289	p.D117V
ENST00000237289	p.K131Q
ENST00000237289	p.C103G
ENST00000278616	p.D126E
ENST00000278616	p.N143S
ENST00000278616	p.Q499E
ENST00000278616	p.D1853G
ENST00000278616	p.G138R
ENST00000278616	p.H1380Y
ENST00000278616	p.Q1867P
ENST00000278616	p.L120R
ENST00000278616	p.R189K
ENST00000278616	p.D1853V
ENST00000278616	p.D1853N
ENST00000269571	p.Y835F
ENST00000269571	p.S760F
ENST00000269571	p.N857S
ENST00000269571	p.I767M
ENST00000269571	p.V842I
ENST00000269571	p.T862A
ENST00000269571	p.D769N
ENST00000269571	p.L755M
ENST00000269571	p.V750E
ENST00000269571	p.N745D
ENST00000269571	p.D769Y
ENST00000269571	p.P856R
ENST00000269571	p.D769H
ENST00000269571	p.E744G
ENST00000269571	p.S649T
ENST00000269571	p.L755S
ENST00000269571	p.A644V
ENST00000269571	p.R678Q
ENST00000269571	p.R688Q
ENST00000269571	p.L663P
ENST00000269571	p.Q679L
ENST00000269305	p.R333P
ENST00000269305	p.F341V
ENST00000269305	p.R342P
ENST00000269305	p.A347P
ENST00000269305	p.I332S
ENST00000269305	p.L350P
ENST00000269305	p.F341Y
ENST00000269305	p.R337S
ENST00000269305	p.N345D
ENST00000269305	p.F341S
ENST00000269305	p.R337C
ENST00000269305	p.I332T
ENST00000269305	p.F341C
ENST00000269305	p.A347T
ENST00000269305	p.L344P
ENST00000269305	p.R337P
ENST00000269305	p.L344R
ENST00000269305	p.R337G
ENST00000269305	p.L348S
ENST00000269305	p.G334W
ENST00000269305	p.A347D
ENST00000269305	p.R337L
ENST00000269305	p.L344Q
ENST00000269305	p.I332N
ENST00000335508	p.I704N
ENST00000335508	p.A708V
ENST00000335508	p.Q699H
ENST00000335508	p.I704F
ENST00000335508	p.V701F
ENST00000335508	p.I704V
ENST00000335508	p.V701I
ENST00000335508	p.A711V
ENST00000335508	p.K700E
ENST00000311936	p.E31Q
ENST00000311936	p.S17N
ENST00000311936	p.V14G
ENST00000311936	p.D33E
ENST00000311936	p.A18T
ENST00000311936	p.V14A
ENST00000311936	p.Q22K
ENST00000311936	p.I24V
ENST00000311936	p.L23R
ENST00000311936	p.P34L
ENST00000311936	p.T35I
ENST00000311936	p.H27N
ENST00000311936	p.G15D
ENST00000311936	p.T20A
ENST00000311936	p.L19F
ENST00000311936	p.I36M
ENST00000311936	p.I24N
ENST00000311936	p.T20R
ENST00000311936	p.T35A
ENST00000311936	p.A18D
ENST00000311936	p.Q22R
ENST00000311936	p.G15S
ENST00000311936	p.I36L
ENST00000311936	p.F28S
ENST00000311936	p.D30E
ENST00000311936	p.I24F
ENST00000311936	p.P34S
ENST00000311936	p.T20S
ENST00000311936	p.S17G
ENST00000311936	p.H27L
ENST00000311936	p.L23I
ENST00000351677	p.E123D
ENST00000351677	p.E139G
ENST00000351677	p.M82T
ENST00000351677	p.Y63F
ENST00000351677	p.T73I
ENST00000351677	p.E76G
ENST00000351677	p.E76K
ENST00000351677	p.E69G
ENST00000351677	p.N58D
ENST00000351677	p.N58Y
ENST00000351677	p.G60R
ENST00000351677	p.G60A
ENST00000351677	p.D155Y
ENST00000351677	p.M82V
ENST00000351677	p.E139D
ENST00000351677	p.D61H
ENST00000351677	p.N308D
ENST00000351677	p.E69K
ENST00000351677	p.F71L
ENST00000351677	p.E69V
ENST00000351677	p.E76Q
ENST00000351677	p.R152H
ENST00000351677	p.A72D
ENST00000351677	p.A72V
ENST00000351677	p.E76V
ENST00000351677	p.N308S
ENST00000351677	p.T52S
ENST00000351677	p.L74M
ENST00000351677	p.A72T
ENST00000351677	p.N58S
ENST00000351677	p.D61V
ENST00000351677	p.D61G
ENST00000351677	p.D155N
ENST00000351677	p.H53Q
ENST00000351677	p.D61Y
ENST00000351677	p.E69D
ENST00000351677	p.G60V
ENST00000351677	p.D61N
ENST00000351677	p.R138Q
ENST00000351677	p.N58K
ENST00000351677	p.L77V
ENST00000351677	p.E76A
ENST00000351677	p.Y63C
ENST00000392485	p.R94P
ENST00000392485	p.P95A
ENST00000392485	p.H99L
ENST00000392485	p.P95S
ENST00000392485	p.P107H
ENST00000392485	p.P95T
ENST00000392485	p.P95H
ENST00000392485	p.P96L
ENST00000392485	p.Y110C
ENST00000392485	p.P95R
ENST00000392485	p.P95L
ENST00000267163	p.L657P
ENST00000267163	p.D718N
ENST00000267163	p.I724N
ENST00000267163	p.K715E
ENST00000267163	p.R661L
ENST00000267163	p.Y728H
ENST00000267163	p.H673P
ENST00000267163	p.R661W
ENST00000267163	p.I703F
ENST00000267163	p.L665R
ENST00000267163	p.Y728C
ENST00000267163	p.T664A
ENST00000267163	p.C706F
ENST00000267163	p.Y659H
ENST00000267163	p.D718G
ENST00000267163	p.K715R
ENST00000267163	p.M704V
ENST00000267163	p.Y659F
ENST00000460680	p.P588T
ENST00000460680	p.G619D
ENST00000263253	p.Q986L
ENST00000357654	p.R1649K
ENST00000357654	p.S114T
ENST00000357654	p.Q1811L
ENST00000357654	p.R506S
ENST00000357654	p.N1819S
ENST00000357654	p.R170Q
ENST00000357654	p.S114P
ENST00000357654	p.E116K
ENST00000357654	p.V1665L
ENST00000357654	p.T1816R
ENST00000357654	p.K1254T
ENST00000357654	p.R1649I
ENST00000357654	p.L814P
ENST00000357654	p.P1749S
ENST00000357654	p.E1725G
ENST00000357654	p.R841W
ENST00000357654	p.T539M
ENST00000357654	p.D1344N
ENST00000357654	p.P871L
ENST00000357654	p.E809G
ENST00000357654	p.M1014I
ENST00000357654	p.E489G
ENST00000357654	p.D1344H
ENST00000357654	p.E1011K
ENST00000357654	p.K690R
ENST00000357654	p.S1009P
ENST00000357654	p.G1422V
ENST00000357654	p.E1258D
ENST00000357654	p.G275D
ENST00000357654	p.D821Y
ENST00000357654	p.G1738R
ENST00000357654	p.E1115Q
ENST00000357654	p.Q687P
ENST00000357654	p.L30F
ENST00000357654	p.K38N
ENST00000357654	p.S1423R
ENST00000357654	p.S1140G
ENST00000233146	p.A917V
ENST00000341105	p.A164T
ENST00000341105	p.P177S
ENST00000541158	p.R46C
ENST00000541158	p.R46H
ENST00000541158	p.L747I
ENST00000498907	p.P239A
ENST00000264033	p.N454D
ENST00000264033	p.R462L
ENST00000298552	p.H408Q
ENST00000298552	p.L72R
ENST00000298552	p.T415I
ENST00000322088	p.E45Q
ENST00000322088	p.R46S
ENST00000288135	p.V833L
ENST00000288135	p.E839G
ENST00000288135	p.S854P
ENST00000288135	p.F848L
ENST00000288135	p.K546E
ENST00000288135	p.M541L
ENST00000288135	p.Y846H
ENST00000288135	p.A829P
ENST00000288135	p.M541V
ENST00000288135	p.A837V
ENST00000288135	p.L548F
ENST00000288135	p.L831P
ENST00000288135	p.C844Y
ENST00000288135	p.M541I
ENST00000288135	p.I538M
ENST00000288135	p.A829V
ENST00000288135	p.F529S
ENST00000288135	p.A829T
ENST00000288135	p.I841V
ENST00000288135	p.E839K
ENST00000288135	p.T847M
ENST00000288135	p.V530I
ENST00000288135	p.V540L
ENST00000288135	p.M541T
ENST00000304494	p.R112G
ENST00000304494	p.D116N
ENST00000304494	p.L113M
ENST00000304494	p.G136S
ENST00000304494	p.R131C
ENST00000304494	p.T137P
ENST00000304494	p.E120A
ENST00000304494	p.P114S
ENST00000304494	p.A134V
ENST00000304494	p.G136D
ENST00000304494	p.V126F
ENST00000304494	p.G139D
ENST00000304494	p.V115E
ENST00000304494	p.A127V
ENST00000304494	p.D108Y
ENST00000304494	p.Y129C
ENST00000304494	p.L130P
ENST00000304494	p.A127S
ENST00000304494	p.G111D
ENST00000304494	p.G135E
ENST00000304494	p.R131L
ENST00000304494	p.R128Q
ENST00000304494	p.A132P
ENST00000304494	p.R131H
ENST00000304494	p.R138T
ENST00000304494	p.Y129H
ENST00000304494	p.R107C
ENST00000304494	p.R128W
ENST00000304494	p.V126I
ENST00000304494	p.A132V
ENST00000304494	p.E119K
ENST00000304494	p.G122D
ENST00000304494	p.A118V
ENST00000304494	p.L113P
ENST00000304494	p.S140C
ENST00000304494	p.R124H
ENST00000304494	p.D116V
ENST00000304494	p.A109V
ENST00000304494	p.V115L
ENST00000304494	p.P114H
ENST00000304494	p.L130R
ENST00000304494	p.L130Q
ENST00000304494	p.E120K
ENST00000304494	p.R112S
ENST00000304494	p.D125E
ENST00000304494	p.T137I
ENST00000304494	p.R112P
ENST00000304494	p.D108H
ENST00000304494	p.R138I
ENST00000304494	p.W110C
ENST00000304494	p.A109T
ENST00000304494	p.E119Q
ENST00000304494	p.D108N
ENST00000304494	p.D116Y
ENST00000304494	p.P114L
ENST00000304494	p.H123Q
ENST00000304494	p.D125N
ENST00000304494	p.R107H
ENST00000304494	p.G135A
ENST00000304494	p.T137A
ENST00000304494	p.G122S
ENST00000304494	p.V126D
ENST00000256474	p.N78S
ENST00000256474	p.L129P
ENST00000256474	p.S65P
ENST00000256474	p.E52K
ENST00000256474	p.N78H
ENST00000256474	p.N131S
ENST00000256474	p.G49D
ENST00000256474	p.N78K
ENST00000256474	p.W117R
ENST00000256474	p.A122E
ENST00000256474	p.F136V
ENST00000256474	p.S65A
ENST00000256474	p.D126N
ENST00000256474	p.G114A
ENST00000256474	p.S68P
ENST00000256474	p.L116P
ENST00000256474	p.A11T
ENST00000256474	p.A50V
ENST00000256474	p.R79G
ENST00000256474	p.V74A
ENST00000256474	p.G57E
ENST00000256474	p.D121E
ENST00000256474	p.E134A
ENST00000256474	p.V130L
ENST00000256474	p.P25S
ENST00000256474	p.D28G
ENST00000256474	p.N78I
ENST00000256474	p.E10G
ENST00000256474	p.C77S
ENST00000256474	p.H115D
ENST00000256474	p.L135F
ENST00000256474	p.G127V
ENST00000256474	p.N78D
ENST00000256474	p.N78Y
ENST00000256474	p.S139P
ENST00000256474	p.F136L
ENST00000256474	p.G144A
ENST00000256474	p.S80N
ENST00000256474	p.A50G
ENST00000256474	p.R120G
ENST00000256474	p.E12K
ENST00000256474	p.L118P
ENST00000256474	p.G39D
ENST00000256474	p.N78T
ENST00000256474	p.G29D
ENST00000256474	p.E36K
ENST00000256474	p.L116I
ENST00000256474	p.P71R
ENST00000256474	p.V142I
ENST00000256474	p.H115N
ENST00000256474	p.W117S
ENST00000256474	p.D121Y
ENST00000256474	p.H115Y
ENST00000256474	p.S65W
ENST00000256474	p.P40S
ENST00000256474	p.F76L
ENST00000256474	p.F76S
ENST00000256474	p.S65L
ENST00000256474	p.S65T
ENST00000256474	p.G114D
ENST00000256474	p.D28E
ENST00000256474	p.S68T
ENST00000256474	p.V130G
ENST00000256474	p.G39S
ENST00000256474	p.V74D
ENST00000256474	p.G144R
ENST00000256474	p.Q132R
ENST00000256474	p.F136C
ENST00000256474	p.L116V
ENST00000256474	p.R79H
ENST00000256474	p.P25L
ENST00000256474	p.G49C
ENST00000256474	p.A50T
ENST00000256474	p.F119L
ENST00000256474	p.W117L
ENST00000256474	p.T133P
ENST00000256474	p.R120S
ENST00000256474	p.T133S
ENST00000256474	p.V130D
ENST00000256474	p.S68L
ENST00000256474	p.D126G
ENST00000256474	p.Q132H
ENST00000256474	p.S33A
ENST00000256474	p.D143G
ENST00000256474	p.E26G
ENST00000256474	p.E31G
ENST00000256474	p.D143N
ENST00000256474	p.P81S
ENST00000256474	p.N131K
ENST00000256474	p.L128P
ENST00000256474	p.L118H
ENST00000256474	p.P138R
ENST00000256474	p.N131Y
ENST00000256474	p.D121G
ENST00000256474	p.R69C
ENST00000256474	p.E51Q
ENST00000256474	p.V74F
ENST00000256474	p.F136S
ENST00000256474	p.N67S
ENST00000256474	p.S72P
ENST00000256474	p.D28V
ENST00000256474	p.E26K
ENST00000256474	p.T133A
ENST00000256474	p.G114V
ENST00000256474	p.E41V
ENST00000256474	p.D121V
ENST00000256474	p.P81T
ENST00000256474	p.L128I
ENST00000256474	p.S38F
ENST00000256474	p.A122V
ENST00000256474	p.E37K
ENST00000256474	p.W117G
ENST00000256474	p.F136I
ENST00000256474	p.P138S
ENST00000256474	p.H115P
ENST00000256474	p.F136Y
ENST00000256474	p.F76Y
ENST00000256474	p.W117C
ENST00000256474	p.V142A
ENST00000256474	p.R79P
ENST00000256474	p.L128R
ENST00000256474	p.P138L
ENST00000256474	p.D143E
ENST00000256474	p.L128H
ENST00000256474	p.A50P
ENST00000256474	p.S80R
ENST00000256474	p.R60W
ENST00000256474	p.V130F
ENST00000334344	p.S1435L
ENST00000371953	p.T131I
ENST00000371953	p.R142W
ENST00000371953	p.L108P
ENST00000371953	p.G20R
ENST00000371953	p.A126V
ENST00000371953	p.H141R
ENST00000371953	p.I135V
ENST00000371953	p.V365E
ENST00000371953	p.L112V
ENST00000371953	p.A126D
ENST00000371953	p.F81C
ENST00000371953	p.D52G
ENST00000371953	p.V119D
ENST00000371953	p.H118R
ENST00000371953	p.H75N
ENST00000371953	p.T348K
ENST00000371953	p.T26I
ENST00000371953	p.C136R
ENST00000371953	p.V53I
ENST00000371953	p.K13E
ENST00000371953	p.S113G
ENST00000371953	p.A137T
ENST00000371953	p.I122S
ENST00000371953	p.Y138D
ENST00000371953	p.R15G
ENST00000371953	p.F37L
ENST00000371953	p.I135M
ENST00000371953	p.D107A
ENST00000371953	p.T131N
ENST00000371953	p.I122T
ENST00000371953	p.M35T
ENST00000371953	p.E288K
ENST00000371953	p.N48D
ENST00000371953	p.E73V
ENST00000371953	p.R55M
ENST00000371953	p.Y16C
ENST00000371953	p.N94S
ENST00000371953	p.T2I
ENST00000371953	p.V53G
ENST00000371953	p.R47M
ENST00000371953	p.P38L
ENST00000371953	p.K80N
ENST00000371953	p.R84G
ENST00000371953	p.N94I
ENST00000371953	p.C105S
ENST00000371953	p.C124Y
ENST00000371953	p.H118L
ENST00000371953	p.E291K
ENST00000371953	p.L139F
ENST00000371953	p.R142L
ENST00000371953	p.K144I
ENST00000371953	p.T348A
ENST00000371953	p.C105R
ENST00000371953	p.L23V
ENST00000371953	p.A137V
ENST00000371953	p.R47G
ENST00000371953	p.K125E
ENST00000371953	p.I5V
ENST00000371953	p.G36V
ENST00000371953	p.W111R
ENST00000371953	p.Y27C
ENST00000371953	p.K128N
ENST00000371953	p.A126P
ENST00000371953	p.K6I
ENST00000371953	p.S287L
ENST00000371953	p.G127R
ENST00000371953	p.P38S
ENST00000371953	p.K6R
ENST00000371953	p.L112R
ENST00000371953	p.I33S
ENST00000371953	p.L140F
ENST00000371953	p.P96Q
ENST00000371953	p.K147T
ENST00000371953	p.P103S
ENST00000371953	p.E307G
ENST00000371953	p.F37S
ENST00000371953	p.F21S
ENST00000371953	p.E18G
ENST00000371953	p.Y27N
ENST00000371953	p.Q17P
ENST00000371953	p.D24E
ENST00000371953	p.D19N
ENST00000371953	p.S287P
ENST00000371953	p.H397Q
ENST00000371953	p.V54E
ENST00000371953	p.T348I
ENST00000371953	p.Q298R
ENST00000371953	p.D375G
ENST00000371953	p.V119F
ENST00000371953	p.A3D
ENST00000371953	p.N48I
ENST00000371953	p.P357S
ENST00000371953	p.G132V
ENST00000371953	p.I135T
ENST00000371953	p.D52N
ENST00000371953	p.Q110R
ENST00000371953	p.H141N
ENST00000371953	p.E114G
ENST00000371953	p.M134L
ENST00000371953	p.S113R
ENST00000371953	p.M134T
ENST00000371953	p.M35V
ENST00000371953	p.M35R
ENST00000371953	p.Y346C
ENST00000371953	p.Y346D
ENST00000371953	p.V53A
ENST00000371953	p.H93Q
ENST00000371953	p.C124R
ENST00000371953	p.K6N
ENST00000371953	p.M1T
ENST00000371953	p.M134I
ENST00000371953	p.G132D
ENST00000371953	p.E7G
ENST00000371953	p.K125N
ENST00000371953	p.A79T
ENST00000371953	p.P96L
ENST00000371953	p.T382A
ENST00000371953	p.I5L
ENST00000371953	p.V45A
ENST00000371953	p.S10R
ENST00000371953	p.G293V
ENST00000371953	p.N49I
ENST00000371953	p.Q110K
ENST00000371953	p.R55G
ENST00000371953	p.C304R
ENST00000371953	p.N94Y
ENST00000371953	p.S10N
ENST00000371953	p.D115N
ENST00000371953	p.D24Y
ENST00000371953	p.R130P
ENST00000371953	p.H123R
ENST00000371953	p.N49T
ENST00000371953	p.C71Y
ENST00000371953	p.P95S
ENST00000371953	p.G132C
ENST00000371953	p.I122N
ENST00000371953	p.P96S
ENST00000371953	p.I101N
ENST00000371953	p.D375N
ENST00000371953	p.G132S
ENST00000371953	p.L25F
ENST00000371953	p.E73K
ENST00000371953	p.C105G
ENST00000371953	p.G293R
ENST00000371953	p.G44D
ENST00000371953	p.K125R
ENST00000371953	p.L112Q
ENST00000371953	p.Y76C
ENST00000371953	p.E291G
ENST00000371953	p.T26P
ENST00000371953	p.T382S
ENST00000371953	p.M134V
ENST00000371953	p.I101M
ENST00000371953	p.H123D
ENST00000371953	p.F145I
ENST00000371953	p.A126S
ENST00000371953	p.V45I
ENST00000371953	p.C71W
ENST00000371953	p.C124F
ENST00000371953	p.A126T
ENST00000371953	p.R142Q
ENST00000371953	p.V119A
ENST00000371953	p.Y46C
ENST00000371953	p.A148S
ENST00000371953	p.A148T
ENST00000371953	p.L112P
ENST00000371953	p.D19G
ENST00000371953	p.L25S
ENST00000371953	p.D24N
ENST00000371953	p.R308H
ENST00000371953	p.L139V
ENST00000371953	p.H141Y
ENST00000371953	p.G129V
ENST00000371953	p.M35I
ENST00000371953	p.F21L
ENST00000371953	p.K128R
ENST00000371953	p.C304G
ENST00000371953	p.V54A
ENST00000371953	p.A3V
ENST00000371953	p.P95L
ENST00000371953	p.R130L
ENST00000371953	p.G129R
ENST00000371953	p.R14M
ENST00000371953	p.V369G
ENST00000371953	p.R14G
ENST00000371953	p.L42P
ENST00000371953	p.G127V
ENST00000371953	p.R130G
ENST00000371953	p.I28M
ENST00000371953	p.Y27D
ENST00000371953	p.G127E
ENST00000371953	p.A120T
ENST00000371953	p.T131P
ENST00000371953	p.T401I
ENST00000371953	p.E299D
ENST00000371953	p.G20E
ENST00000371953	p.D116G
ENST00000371953	p.E352G
ENST00000371953	p.L108R
ENST00000371953	p.E307K
ENST00000371953	p.N31H
ENST00000371953	p.T131A
ENST00000371953	p.H123Y
ENST00000371953	p.R15S
ENST00000371953	p.C105F
ENST00000371953	p.A121E
ENST00000371953	p.M134R
ENST00000371953	p.K147M
ENST00000371953	p.Y46H
ENST00000371953	p.R74I
ENST00000371953	p.I122V
ENST00000371953	p.C136F
ENST00000371953	p.R15K
ENST00000371953	p.E299G
ENST00000371953	p.G36E
ENST00000371953	p.K13Q
ENST00000371953	p.K128E
ENST00000371953	p.R15I
ENST00000371953	p.C105W
ENST00000371953	p.G129E
ENST00000371953	p.C304S
ENST00000371953	p.L140S
ENST00000371953	p.T398S
ENST00000371953	p.K125T
ENST00000371953	p.E284K
ENST00000371953	p.C136W
ENST00000371953	p.L112I
ENST00000371953	p.N82T
ENST00000371953	p.R130Q
ENST00000371953	p.H397R
ENST00000371953	p.L146V
ENST00000371953	p.V119I
ENST00000371953	p.R308C
ENST00000371953	p.K144Q
ENST00000371953	p.Y27H
ENST00000371953	p.I101T
ENST00000371953	p.E284G
ENST00000371953	p.G132R
ENST00000371953	p.A121P
ENST00000371953	p.V365I
ENST00000371953	p.H397Y
ENST00000371953	p.L23F
ENST00000371953	p.S10I
ENST00000371953	p.D107Y
ENST00000371953	p.A3S
ENST00000371953	p.D24G
ENST00000371953	p.T26A
ENST00000371953	p.C136Y
ENST00000371953	p.Y138C
ENST00000371953	p.V369A
ENST00000371953	p.L42R
ENST00000371953	p.N31K
ENST00000371953	p.F81L
ENST00000371953	p.A39T
ENST00000371953	p.T78A
ENST00000371953	p.C105Y
ENST00000371953	p.S364C
ENST00000371953	p.G36R
ENST00000371953	p.E314K
ENST00000371953	p.K147R
ENST00000371953	p.D107N
ENST00000371953	p.A34D
ENST00000371953	p.I135K
ENST00000371953	p.S364P
ENST00000371953	p.V54L
ENST00000371953	p.P96T
ENST00000371953	p.P38R
ENST00000371953	p.T383I
ENST00000371953	p.Y27S
ENST00000371953	p.K80E
ENST00000371953	p.C124S
ENST00000371953	p.V133I
ENST00000440486	p.R399H
ENST00000440486	p.G380R
ENST00000440486	p.A391E
ENST00000440486	p.F386L
ENST00000440486	p.F384L
ENST00000440486	p.G370C
ENST00000440486	p.G382D
ENST00000440486	p.Y379C
ENST00000440486	p.G380E
ENST00000440486	p.Y373C
ENST00000440486	p.R399C
ENST00000440486	p.S371C
ENST00000355710	p.R330Q
ENST00000355710	p.A756V
ENST00000355710	p.V706M
ENST00000355710	p.K808E
ENST00000355710	p.C634Y
ENST00000355710	p.P766S
ENST00000355710	p.C634F
ENST00000355710	p.G894S
ENST00000355710	p.M918V
ENST00000355710	p.G748C
ENST00000355710	p.K821E
ENST00000355710	p.S345R
ENST00000355710	p.A883S
ENST00000355710	p.M918T
ENST00000355710	p.G344S
ENST00000355710	p.G911C
ENST00000355710	p.C634R
ENST00000355710	p.C630S
ENST00000355710	p.T966A
ENST00000355710	p.A680T
ENST00000355710	p.R330W
ENST00000355710	p.A883T
ENST00000355710	p.R959W
ENST00000355710	p.G911D
ENST00000355710	p.D925H
ENST00000355710	p.Q781R
ENST00000355710	p.Q703H
ENST00000355710	p.E337K
ENST00000355710	p.A919V
ENST00000355710	p.D631N
ENST00000355710	p.A883P
ENST00000355710	p.T328S
ENST00000355710	p.R820L
ENST00000355710	p.S922P
ENST00000355710	p.C634W
ENST00000355710	p.M759I
ENST00000355710	p.A664D
ENST00000355710	p.T636M
ENST00000355710	p.R959Q
ENST00000355710	p.V648I
ENST00000355710	p.C656F
ENST00000355710	p.E921K
ENST00000355710	p.E884V
ENST00000355710	p.V706A
ENST00000355710	p.V804M
ENST00000355710	p.C634S
ENST00000355710	p.D631G
ENST00000355710	p.L923V
ENST00000355710	p.T930M
ENST00000355710	p.N763K
ENST00000355710	p.R873W
ENST00000355710	p.A750V
ENST00000355710	p.R969Q
ENST00000355710	p.C630R
ENST00000355710	p.R912L
ENST00000355710	p.E884K
ENST00000355710	p.D925G
ENST00000355710	p.E768G
ENST00000355710	p.C630G
ENST00000355710	p.S932T
ENST00000355710	p.E768D
ENST00000355710	p.A876V
ENST00000355710	p.N879S
ENST00000342988	p.E538G
ENST00000342988	p.K428T
ENST00000342988	p.R441P
ENST00000342988	p.L495R
ENST00000342988	p.L540P
ENST00000342988	p.S504I
ENST00000342988	p.K428R
ENST00000342988	p.E538K
ENST00000342988	p.L536Q
ENST00000342988	p.D493A
ENST00000342988	p.D493N
ENST00000342988	p.V492F
ENST00000342988	p.A433T
ENST00000342988	p.K507Q
ENST00000342988	p.D494Y
ENST00000342988	p.R502G
ENST00000342988	p.H541Y
ENST00000342988	p.R416I
ENST00000342988	p.R441S
ENST00000342988	p.F408S
ENST00000342988	p.F408L
ENST00000342988	p.V506M
ENST00000342988	p.D537V
ENST00000342988	p.G419V
ENST00000342988	p.E526V
ENST00000342988	p.D537Y
ENST00000342988	p.A452T
ENST00000342988	p.L533R
ENST00000342988	p.E526K
ENST00000342988	p.S504G
ENST00000342988	p.S504R
ENST00000342988	p.A532D
ENST00000342988	p.V539G
ENST00000342988	p.V492A
ENST00000342988	p.C523W
ENST00000342988	p.C499R
ENST00000342988	p.G419R
ENST00000342988	p.D537G
ENST00000342988	p.V506E
ENST00000342988	p.A532V
ENST00000342988	p.D494G
ENST00000342988	p.K428M
ENST00000342988	p.R496H
ENST00000342988	p.R531W
ENST00000342988	p.R420C
ENST00000342988	p.L533V
ENST00000342988	p.W524C
ENST00000342988	p.L533F
ENST00000342988	p.P550S
ENST00000342988	p.A406T
ENST00000342988	p.A457V
ENST00000342988	p.E526G
ENST00000342988	p.A457S
ENST00000342988	p.R441C
ENST00000342988	p.Q534P
ENST00000342988	p.R416S
ENST00000342988	p.D493H
ENST00000342988	p.R420S
ENST00000342988	p.G491V
ENST00000342988	p.P550T
ENST00000342988	p.R497H
ENST00000342988	p.K507R
ENST00000342988	p.G419W
ENST00000342988	p.D537E
ENST00000342988	p.K436N
ENST00000342988	p.W524S
ENST00000342988	p.K507E
ENST00000342988	p.D537H
ENST00000342988	p.W509R
ENST00000342988	p.R502K
ENST00000342988	p.K428N
ENST00000342988	p.R420H
ENST00000342988	p.A433V
ENST00000342988	p.R531Q
ENST00000342988	p.C499Y
ENST00000342988	p.D494N
ENST00000342988	p.L540R
ENST00000342988	p.S432G
ENST00000342988	p.V506A
ENST00000342988	p.A406V
ENST00000342988	p.F505Y
ENST00000342988	p.Y412H
ENST00000342988	p.V437D
ENST00000342988	p.I527V
ENST00000375687	p.A1312V
ENST00000375687	p.D756N
ENST00000375687	p.P1322R
ENST00000375687	p.P1330H
ENST00000375687	p.G659D
ENST00000375687	p.R1316H
ENST00000375687	p.G1339E
ENST00000375687	p.D741V
ENST00000375687	p.P753L
ENST00000375687	p.G650D
ENST00000375687	p.R1224T
ENST00000375687	p.A1312E
ENST00000375687	p.S1341N
ENST00000375687	p.I1220F
ENST00000263121	p.R242G
ENST00000263121	p.T232M
ENST00000263121	p.R242K
ENST00000281708	p.T196S
ENST00000281708	p.D211N
ENST00000231790	p.E523D
ENST00000231790	p.G67R
ENST00000231790	p.R385H
ENST00000231790	p.R385C
ENST00000231790	p.A681T
ENST00000231790	p.G101S
ENST00000231790	p.K118N
ENST00000231790	p.E703A
ENST00000231790	p.V384A
ENST00000231790	p.T367A
ENST00000231790	p.H381R
ENST00000231790	p.D631H
ENST00000231790	p.R522L
ENST00000231790	p.L658I
ENST00000231790	p.G54E
ENST00000231790	p.G101D
ENST00000231790	p.T495A
ENST00000231790	p.G357A
ENST00000231790	p.A681V
ENST00000231790	p.E13K
ENST00000231790	p.I501V
ENST00000231790	p.S131P
ENST00000231790	p.N158D
ENST00000231790	p.M587V
ENST00000231790	p.I630S
ENST00000231790	p.P469L
ENST00000231790	p.N158H
ENST00000231790	p.R9Q
ENST00000231790	p.V16M
ENST00000231790	p.A210T
ENST00000231790	p.L724W
ENST00000231790	p.L582V
ENST00000231790	p.E523K
ENST00000231790	p.P709Q
ENST00000231790	p.A410T
ENST00000231790	p.R325Q
ENST00000231790	p.S508N
ENST00000231790	p.E172K
ENST00000231790	p.R69K
ENST00000231790	p.E754Q
ENST00000231790	p.N158S
ENST00000231790	p.N158Y
ENST00000231790	p.R217C
ENST00000231790	p.E89K
ENST00000231790	p.H543R
ENST00000231790	p.D41Y
ENST00000231790	p.A410G
ENST00000231790	p.I219V
ENST00000231790	p.K618E
ENST00000231790	p.V384D
ENST00000231790	p.K618R
ENST00000231790	p.L590I
ENST00000231790	p.E523G
ENST00000231790	p.K618T
ENST00000231790	p.R226Q
ENST00000231790	p.R522W
ENST00000231790	p.E457Q
ENST00000396946	p.I544T
ENST00000396946	p.E528K
ENST00000389048	p.R1275Q
ENST00000389048	p.R1209Q
ENST00000389048	p.T1151A
ENST00000389048	p.R311L
ENST00000389048	p.R292C
ENST00000389048	p.R200S
ENST00000389048	p.M1138K
ENST00000389048	p.A585T
ENST00000389048	p.G1201E
ENST00000389048	p.L560S
ENST00000389048	p.V132L
ENST00000389048	p.A206V
ENST00000389048	p.F1245V
ENST00000389048	p.G875R
ENST00000389048	p.R291H
ENST00000389048	p.A1200V
ENST00000389048	p.P542R
ENST00000389048	p.F1174C
ENST00000389048	p.S1157T
ENST00000389048	p.Q673K
ENST00000389048	p.A1168P
ENST00000389048	p.F1245C
ENST00000389048	p.L566F
ENST00000389048	p.S409I
ENST00000389048	p.Y479D
ENST00000389048	p.G843R
ENST00000389048	p.P666S
ENST00000389048	p.A1234T
ENST00000389048	p.I393N
ENST00000389048	p.F1245I
ENST00000389048	p.Y984C
ENST00000389048	p.F1245L
ENST00000389048	p.R1275L
ENST00000389048	p.R551Q
ENST00000389048	p.L1240V
ENST00000389048	p.R1253G
ENST00000389048	p.G1269A
ENST00000389048	p.R188C
ENST00000389048	p.F1174S
ENST00000389048	p.L322I
ENST00000389048	p.L321I
ENST00000389048	p.E192K
ENST00000389048	p.R557C
ENST00000389048	p.K1491R
ENST00000389048	p.L1196M
ENST00000389048	p.A1553T
ENST00000389048	p.R179H
ENST00000389048	p.R401Q
ENST00000389048	p.V1135E
ENST00000389048	p.R291C
ENST00000389048	p.R395H
ENST00000389048	p.G1121D
ENST00000389048	p.I1268S
ENST00000389048	p.C1156Y
ENST00000389048	p.G446R
ENST00000389048	p.S865P
ENST00000389048	p.D854N
ENST00000389048	p.Y1278S
ENST00000389048	p.L1196Q
ENST00000389048	p.L521P
ENST00000389048	p.T1151M
ENST00000389048	p.G1202R
ENST00000389048	p.A877S
ENST00000389048	p.R311H
ENST00000389048	p.H458Q
ENST00000389048	p.A149V
ENST00000389048	p.F539C
ENST00000389048	p.T535P
ENST00000389048	p.P294T
ENST00000389048	p.L1152R
ENST00000389048	p.F1174V
ENST00000389048	p.A207T
ENST00000389048	p.F1174I
ENST00000389048	p.S329F
ENST00000389048	p.D1225N
ENST00000389048	p.K1352N
ENST00000389048	p.P316R
ENST00000389048	p.A1251D
ENST00000389048	p.T1211A
ENST00000389048	p.P666L
ENST00000389048	p.L560F
ENST00000389048	p.R1212H
ENST00000389048	p.S1206Y
ENST00000389048	p.G1184E
ENST00000389048	p.G1128A
ENST00000389048	p.R1214C
ENST00000389048	p.L1152P
ENST00000389048	p.F1174L
ENST00000389048	p.D1091N
ENST00000389048	p.G394R
ENST00000389048	p.A1479E
ENST00000389048	p.E1558Q
ENST00000389048	p.L1198F
ENST00000389048	p.M1166R
ENST00000389048	p.R1279M
ENST00000389048	p.R1231Q
ENST00000338641	p.K364I
[truncated: 152 more rows]

## Sheet: Negative samples
Transcript_ID	AA_Change
ENST00000231790	p.P496R
ENST00000231790	p.P496L
ENST00000265849	p.P540T
ENST00000234420	p.P623A
ENST00000234420	p.P623L
ENST00000265849	p.R563L
ENST00000234420	p.P831A
ENST00000355774	p.P844L
ENST00000275493	p.P848L
ENST00000371953	p.S10N
ENST00000507379	p.S1126R
ENST00000540549	p.S1290A
ENST00000234420	p.S1329L
ENST00000309486	p.S1473P
ENST00000420246	p.S215C
ENST00000265849	p.L571I
ENST00000544455	p.S2695L
ENST00000231790	p.S295G
ENST00000234420	p.S315F
ENST00000216797	p.S32I
ENST00000298552	p.S35C
ENST00000371953	p.S362L
ENST00000231790	p.S420C
ENST00000265849	p.S445T
ENST00000406134	p.I577T
ENST00000231790	p.S44A
ENST00000265849	p.S455A
ENST00000231790	p.S459L
ENST00000265849	p.S477F
ENST00000265849	p.S523T
ENST00000234420	p.S532A
ENST00000406134	p.S554T
ENST00000231790	p.E578G
ENST00000256474	p.S65A
ENST00000234420	p.S65L
ENST00000357654	p.S741F
ENST00000269571	p.S760A
ENST00000355710	p.S767R
ENST00000406134	p.S860L
ENST00000231790	p.P581L
ENST00000231790	p.S95A
ENST00000389048	p.T1087I
ENST00000389048	p.T1151M
ENST00000420246	p.T123A
ENST00000371953	p.T131S
ENST00000544455	p.T582P
ENST00000389048	p.T1343I
ENST00000420246	p.T150I
ENST00000257555	p.T196A
ENST00000545250	p.E586G
ENST00000281708	p.T205A
ENST00000496384	p.T241P
ENST00000342788	p.T244R
ENST00000234420	p.T269S
ENST00000337432	p.T287A
ENST00000355710	p.T338I
ENST00000338641	p.T352M
ENST00000428558	p.P591L
ENST00000231790	p.T364A
ENST00000418115	p.T37A
ENST00000371953	p.T401I
ENST00000231790	p.T413I
ENST00000298552	p.T417I
ENST00000406134	p.T441P
ENST00000406134	p.T44M
ENST00000406134	p.T564A
ENST00000265849	p.T573S
ENST00000231790	p.T662P
ENST00000406134	p.T682A
ENST00000457416	p.T730S
ENST00000406134	p.T803A
ENST00000406134	p.T807S
ENST00000406134	p.T8M
ENST00000406134	p.T905R
ENST00000406134	p.T905I
ENST00000355774	p.W1276R
ENST00000460680	p.S596G
ENST00000288602	p.W531C
ENST00000234420	p.Y1128C
ENST00000269571	p.Y1248F
ENST00000554581	p.Y18S
ENST00000308731	p.Y223F
ENST00000544455	p.Y2624C
ENST00000261584	p.Y334C
ENST00000402690	p.Y406H
ENST00000406134	p.Y408C
ENST00000265849	p.Y519C
ENST00000308731	p.Y551F
ENST00000231790	p.Y646C
ENST00000269571	p.N835I
ENST00000406134	p.V102I
ENST00000544455	p.V1076I
ENST00000265849	p.T597S
ENST00000357654	p.V1665M
ENST00000357654	p.V1804A
ENST00000231790	p.V213A
ENST00000231790	p.V213L
ENST00000544455	p.V2908G
ENST00000402690	p.V319D
ENST00000406134	p.V342I
ENST00000342788	p.V348L
ENST00000371953	p.V369G
ENST00000355774	p.V420I
ENST00000265849	p.V467G
ENST00000389301	p.V6D
ENST00000231790	p.V506A
ENST00000555427	p.V60L
ENST00000381652	p.V617F
ENST00000231790	p.V647M
ENST00000355710	p.V648I
ENST00000267101	p.V714M
ENST00000406134	p.V722I
ENST00000355774	p.V741F
ENST00000358487	p.E755K
ENST00000234420	p.V800A
ENST00000234420	p.V800L
ENST00000355710	p.V804G
ENST00000544455	p.V831I
ENST00000275493	p.V851A
ENST00000233146	p.V923E
ENST00000555427	p.V92M
ENST00000355774	p.V971I
ENST00000234420	p.R468H
ENST00000357654	p.R1347G
ENST00000460680	p.T613M
ENST00000261584	p.A712V
ENST00000260947	p.Q11H
ENST00000265433	p.K408E
ENST00000405598	p.I448S
ENST00000259008	p.R106H
ENST00000540549	p.P363L
ENST00000307102	p.E44G
ENST00000231790	p.K618T
ENST00000288602	p.V600A
ENST00000372470	p.W515C
ENST00000269571	p.K676R
ENST00000269571	p.Q680R
ENST00000269571	p.R647K
ENST00000269571	p.K753E
ENST00000307102	p.A52V
ENST00000440973	p.S432L
ENST00000440973	p.V534E
ENST00000287598	p.V618A
ENST00000288602	p.W450L
ENST00000261799	p.P660T
ENST00000554581	p.R121W
ENST00000389048	p.A1266V
ENST00000389048	p.A195V
ENST00000389048	p.A585T
ENST00000389048	p.D1529E
ENST00000389048	p.E994K
ENST00000389048	p.F457L
ENST00000389048	p.G1137R
ENST00000389048	p.G1552R
ENST00000389048	p.G875R
ENST00000389048	p.H354Q
ENST00000389048	p.K1491R
ENST00000389048	p.L560F
ENST00000389048	p.M301I
ENST00000389048	p.M552I
ENST00000389048	p.P336S
ENST00000389048	p.P858S
ENST00000389048	p.R133H
ENST00000265849	p.M622I
ENST00000389048	p.R401Q
ENST00000389048	p.S529Y
ENST00000389048	p.T680I
ENST00000389048	p.V1545I
ENST00000389048	p.V476A
ENST00000389048	p.S711R
ENST00000389048	p.S865P
ENST00000288602	p.A320T
ENST00000288602	p.A762V
ENST00000288602	p.D380H
ENST00000287647	p.Q623P
ENST00000288602	p.E228V
ENST00000288602	p.E275K
ENST00000288602	p.F259L
ENST00000288602	p.F294L
ENST00000288602	p.G104E
ENST00000496384	p.D29Y
ENST00000496384	p.D74N
ENST00000496384	p.L203F
ENST00000288602	p.K205Q
ENST00000496384	p.K306E
ENST00000544455	p.T630I
ENST00000288602	p.L485F
ENST00000288602	p.N49I
ENST00000496384	p.I189L
ENST00000288602	p.P141L
ENST00000288602	p.P162S
ENST00000288602	p.P341S
ENST00000288602	p.P348T
ENST00000496384	p.S217I
ENST00000288602	p.R188T
ENST00000288602	p.R271H
ENST00000441310	p.Y631H
ENST00000288602	p.R389C
ENST00000496384	p.E70K
ENST00000496384	p.H116Q
ENST00000496384	p.E279K
ENST00000288602	p.S364L
ENST00000496384	p.L27I
ENST00000496384	p.L210F
ENST00000496384	p.P9S
ENST00000496384	p.Q78K
ENST00000496384	p.Q66H
ENST00000496384	p.M246I
ENST00000496384	p.T80A
ENST00000579755	p.G155V
ENST00000579755	p.R123H
ENST00000304494	p.H123Q
ENST00000406381	p.A1186D
ENST00000406381	p.A263T
ENST00000406381	p.D1114Y
ENST00000406381	p.D739H
ENST00000406381	p.D739N
ENST00000389301	p.P643A
ENST00000406381	p.D850N
ENST00000406381	p.E991Q
ENST00000406381	p.E1214D
ENST00000406381	p.E1214Q
ENST00000406381	p.E250K
ENST00000406381	p.E900D
ENST00000406381	p.G985W
ENST00000406381	p.G279A
ENST00000406381	p.G279E
ENST00000406381	p.H443N
ENST00000375687	p.G652S
ENST00000406381	p.I71S
ENST00000406381	p.I625V
ENST00000406381	p.I737M
ENST00000406381	p.K198N
ENST00000406381	p.L115F
ENST00000406381	p.L315V
ENST00000406381	p.L633P
ENST00000406381	p.L725M
ENST00000406381	p.M923I
ENST00000406381	p.N1189S
ENST00000406381	p.N541K
ENST00000406381	p.P1140A
ENST00000406381	p.P1180S
ENST00000406381	p.P92Q
ENST00000406381	p.P217S
ENST00000406381	p.P6S
ENST00000406381	p.G353E
ENST00000406381	p.P361Q
ENST00000406381	p.P459L
ENST00000406381	p.Q681H
ENST00000269571	p.I655V
ENST00000406381	p.R976C
ENST00000406381	p.R1023M
ENST00000406381	p.R108W
ENST00000406381	p.R457W
ENST00000406381	p.R648Q
ENST00000406381	p.R653Q
ENST00000406381	p.R867Q
ENST00000406381	p.S275F
ENST00000406381	p.S543L
ENST00000406381	p.T276M
ENST00000544455	p.P655R
ENST00000406381	p.T622R
ENST00000406381	p.T656M
ENST00000406381	p.T703I
ENST00000406381	p.V743M
ENST00000406381	p.V752I
ENST00000406381	p.V812I
ENST00000406381	p.Y773H
ENST00000406381	p.Y805F
ENST00000406381	p.D1028A
ENST00000406381	p.D552N
ENST00000303115	p.I66T
ENST00000406381	p.D712H
ENST00000406381	p.E1034Q
ENST00000406381	p.E900K
ENST00000406381	p.P1204S
ENST00000406381	p.T152I
ENST00000447712	p.A299S
ENST00000447712	p.C412Y
ENST00000447712	p.D123V
ENST00000447712	p.E391K
ENST00000447712	p.K322E
ENST00000447712	p.L155F
ENST00000447712	p.P156S
ENST00000447712	p.P803L
ENST00000447712	p.P803S
ENST00000447712	p.R240H
ENST00000447712	p.R281W
ENST00000447712	p.R455C
ENST00000447712	p.R853C
ENST00000447712	p.T401A
ENST00000447712	p.V304M
ENST00000447712	p.V491A
ENST00000447712	p.Y338N
ENST00000358487	p.C270Y
ENST00000358487	p.D215N
ENST00000358487	p.E619K
ENST00000358487	p.G227E
ENST00000358487	p.K203M
ENST00000358487	p.L169F
ENST00000358487	p.M279R
ENST00000358487	p.S324F
ENST00000369448	p.H67Q
ENST00000358487	p.S687A
ENST00000358487	p.T282A
ENST00000358487	p.V280M
ENST00000313949	p.R6P
ENST00000313949	p.T225P
ENST00000307102	p.P124S
ENST00000397752	p.A354D
ENST00000397752	p.F434C
ENST00000397752	p.H644Y
ENST00000397752	p.H979Y
ENST00000355710	p.G691S
ENST00000397752	p.I367V
ENST00000397752	p.M1192I
ENST00000397752	p.P351A
ENST00000397752	p.R1086K
ENST00000397752	p.R413G
ENST00000397752	p.T69K
ENST00000397752	p.V486A
ENST00000397752	p.Y205C
ENST00000392485	p.P95H
ENST00000392485	p.P95R
ENST00000249373	p.P641A
ENST00000249373	p.R398Q
ENST00000249373	p.V414A
ENST00000249373	p.A729V
ENST00000249373	p.D613N
ENST00000249373	p.E194K
ENST00000249373	p.E518D
ENST00000249373	p.G328V
ENST00000249373	p.G527E
ENST00000249373	p.H227Y
ENST00000536777	p.T692K
ENST00000541398	p.W371G
ENST00000249373	p.L221F
ENST00000249373	p.N396S
ENST00000249373	p.R400C
ENST00000249373	p.R562Q
ENST00000249373	p.R628W
ENST00000249373	p.S533N
ENST00000249373	p.T336P
ENST00000249373	p.V54M
ENST00000249373	p.W535L
ENST00000342988	p.K436N
ENST00000357654	p.D693N
ENST00000351677	p.E69K
ENST00000351677	p.N58K
ENST00000351677	p.T73I
ENST00000351677	p.V51A
ENST00000351677	p.E139D
ENST00000351677	p.E76Q
ENST00000351677	p.G60R
ENST00000351677	p.N308D
ENST00000351677	p.Q79R
ENST00000371953	p.A79T
ENST00000369089	p.I69M
ENST00000371953	p.S294R
ENST00000263967	p.C24Y
ENST00000263967	p.C420G
ENST00000263967	p.E149G
ENST00000263967	p.E218K
ENST00000263967	p.F614I
ENST00000263967	p.G363A
ENST00000263967	p.L766F
ENST00000263967	p.M1040V
ENST00000263967	p.R108L
ENST00000263967	p.R382K
ENST00000263967	p.R38C
ENST00000263967	p.R398H
ENST00000263967	p.R818C
ENST00000263967	p.R975S
ENST00000263967	p.V356I
ENST00000263967	p.W11L
ENST00000257290	p.E828K
ENST00000257290	p.E459D
ENST00000257290	p.G185W
ENST00000344576	p.S703F
ENST00000257290	p.G589E
ENST00000257290	p.L31F
ENST00000257290	p.P414L
ENST00000257290	p.R797K
ENST00000257290	p.R558C
ENST00000257290	p.R524C
ENST00000257290	p.S308F
ENST00000257290	p.S607L
ENST00000257290	p.T153A
ENST00000257290	p.V193I
ENST00000428558	p.E71G
ENST00000257290	p.V484M
ENST00000340107	p.A391V
ENST00000340107	p.A453S
ENST00000340107	p.G739A
ENST00000340107	p.G762E
ENST00000340107	p.H274Y
ENST00000340107	p.P402S
ENST00000340107	p.R399C
ENST00000340107	p.S187Y
ENST00000340107	p.T394M
ENST00000287647	p.P714L
ENST00000340107	p.V390M
ENST00000340107	p.V643M
ENST00000359195	p.A569T
ENST00000359195	p.G426E
ENST00000359195	p.R130Q
ENST00000377045	p.A474T
ENST00000377045	p.E568Q
ENST00000377045	p.G446D
ENST00000377045	p.G459W
ENST00000377045	p.G496E
ENST00000231790	p.V716M
ENST00000377045	p.G496W
ENST00000377045	p.N537K
ENST00000377045	p.P539H
ENST00000377045	p.Q461R
ENST00000377045	p.R188H
ENST00000377045	p.R428Q
ENST00000377045	p.R557Q
ENST00000377045	p.R579Q
ENST00000377045	p.S467L
ENST00000377045	p.T452I
ENST00000231790	p.H718Y
ENST00000377045	p.D402N
ENST00000377045	p.P270Q
ENST00000275493	p.A705P
ENST00000275493	p.A819T
ENST00000275493	p.A826T
ENST00000275493	p.D964N
ENST00000275493	p.D1027E
ENST00000275493	p.D146N
ENST00000275493	p.D567N
ENST00000275493	p.E114K
ENST00000420246	p.P72R
ENST00000275493	p.E237K
ENST00000275493	p.E45Q
ENST00000275493	p.E468D
ENST00000275493	p.E645K
ENST00000275493	p.E823G
ENST00000275493	p.E839K
ENST00000275493	p.E922A
ENST00000275493	p.F667L
ENST00000275493	p.G42D
ENST00000275493	p.G553A
ENST00000544455	p.N372H
ENST00000275493	p.G690S
ENST00000275493	p.G818D
ENST00000275493	p.I430V
ENST00000275493	p.K663M
ENST00000275493	p.K692E
ENST00000275493	p.L1042P
ENST00000275493	p.L38V
ENST00000275493	p.L588F
ENST00000275493	p.L793M
ENST00000275493	p.N781S
ENST00000275493	p.P1014R
ENST00000275493	p.P328Q
ENST00000275493	p.P749S
ENST00000275493	p.Q105H
ENST00000275493	p.Q1164R
ENST00000275493	p.R207C
ENST00000275493	p.R786C
ENST00000275493	p.R98Q
ENST00000275493	p.S116F
ENST00000275493	p.S175P
ENST00000541158	p.E727D
ENST00000275493	p.S723N
ENST00000275493	p.S739F
ENST00000275493	p.T580A
ENST00000275493	p.V547I
ENST00000275493	p.V729L
ENST00000275493	p.S153R
ENST00000477593	p.A19V
ENST00000477593	p.A50P
ENST00000477593	p.A830T
ENST00000477593	p.A875D
ENST00000541158	p.N744K
ENST00000477593	p.D1020H
ENST00000477593	p.D1046N
ENST00000477593	p.D1067A
ENST00000477593	p.E1036K
ENST00000477593	p.E1047K
ENST00000477593	p.E158K
ENST00000477593	p.F876L
ENST00000477593	p.G252R
ENST00000477593	p.H135N
ENST00000477593	p.I512M
ENST00000395673	p.S75G
ENST00000477593	p.I670L
ENST00000477593	p.I992T
ENST00000477593	p.K290N
ENST00000477593	p.K61T
ENST00000477593	p.K805E
ENST00000477593	p.L140S
ENST00000477593	p.L674P
ENST00000477593	p.L768F
ENST00000477593	p.M68I
ENST00000477593	p.N271D
ENST00000477593	p.N442K
ENST00000477593	p.P615A
ENST00000477593	p.P785H
ENST00000477593	p.R103K
ENST00000477593	p.R149Q
ENST00000477593	p.R270W
ENST00000477593	p.R321Q
ENST00000477593	p.R668W
ENST00000477593	p.R847G
ENST00000477593	p.R981P
ENST00000375687	p.V751I
ENST00000477593	p.S183F
ENST00000477593	p.S4C
ENST00000477593	p.T1055A
ENST00000477593	p.T417M
ENST00000477593	p.T859A
ENST00000477593	p.V789G
ENST00000477593	p.V967A
ENST00000477593	p.W462S
ENST00000477593	p.W827L
ENST00000430669	p.T1404A
ENST00000269571	p.P8T
ENST00000430669	p.D894N
ENST00000430669	p.G1212D
ENST00000430669	p.T768I
ENST00000536656	p.A310T
ENST00000536656	p.A361T
ENST00000536656	p.A873V
ENST00000536656	p.E897K
ENST00000536656	p.F943Y
ENST00000536656	p.R572W
ENST00000536656	p.R845C
ENST00000372104	p.V8M
ENST00000536656	p.R845H
ENST00000536656	p.R1006W
ENST00000536656	p.V20I
ENST00000536656	p.Y251C
ENST00000382100	p.R231H
ENST00000251849	p.A389T
ENST00000251849	p.A566V
ENST00000251849	p.C168Y
ENST00000251849	p.D447N
ENST00000251849	p.E425D
ENST00000423192	p.F77S
ENST00000251849	p.E622D
ENST00000251849	p.H173Y
ENST00000251849	p.N140H
ENST00000251849	p.P210S
ENST00000251849	p.P505S
ENST00000251849	p.P578S
ENST00000251849	p.Q39E
ENST00000251849	p.R191I
ENST00000251849	p.R215C
ENST00000251849	p.R223M
ENST00000309486	p.V772A
ENST00000372470	p.T374A
ENST00000251849	p.R41L
ENST00000251849	p.R41P
ENST00000251849	p.R495C
ENST00000251849	p.R59S
ENST00000251849	p.S12N
ENST00000251849	p.S220F
ENST00000251849	p.S257L
ENST00000251849	p.S259C
ENST00000251849	p.V21M
ENST00000251849	p.V537I
ENST00000265849	p.N775S
ENST00000251849	p.V561L
ENST00000267101	p.D297Y
ENST00000267101	p.G40S
ENST00000267101	p.V104M
ENST00000282397	p.L592M
ENST00000282397	p.L778P
ENST00000282397	p.R781Q
ENST00000282397	p.V395I
ENST00000268035	p.E1356K
ENST00000268035	p.F1057L
ENST00000268035	p.P327S
ENST00000440973	p.E247K
ENST00000440973	p.P535H
ENST00000440973	p.R269C
ENST00000440973	p.R555C
ENST00000440973	p.V392I
ENST00000301178	p.A857V
ENST00000301178	p.P444S
ENST00000301178	p.R506H
ENST00000301178	p.R527L
ENST00000301178	p.R800L
ENST00000301178	p.T568M
ENST00000301178	p.W426R
ENST00000366539	p.M339I
ENST00000366539	p.S370P
ENST00000389301	p.G809D
ENST00000357654	p.N810Y
ENST00000301067	p.P813L
ENST00000355774	p.S817G
ENST00000309486	p.T826K
ENST00000389301	p.N8K
ENST00000277541	p.C838Y
ENST00000357654	p.R841W
ENST00000397752	p.N375S
ENST00000373344	p.F847S
ENST00000265849	p.G857A
ENST00000357654	p.R866C
ENST00000355112	p.P868L
ENST00000234420	p.V878A
ENST00000264122	p.N883D
ENST00000412450	p.D891H
ENST00000406134	p.Q915R
ENST00000259008	p.S919P
ENST00000378643	p.S378L
ENST00000257555	p.A98V
ENST00000263253	p.I997V
ENST00000428558	p.R1005Q
ENST00000357654	p.M1008I
ENST00000237289	p.N102S
ENST00000309486	p.S1040N
ENST00000418258	p.T1044S
ENST00000357654	p.Y105C
ENST00000544455	p.S384F
ENST00000406134	p.R106K
ENST00000409792	p.M1080I
ENST00000389301	p.S1088F
ENST00000357654	p.P1099L
ENST00000355739	p.D1104H
ENST00000355716	p.S112Y
ENST00000430669	p.S1131C
ENST00000231790	p.V384D
ENST00000357654	p.S1140G
ENST00000309486	p.D1155H
ENST00000430669	p.T1164I
ENST00000355716	p.A117T
ENST00000406381	p.Q1170E
ENST00000560509	p.V1190I
ENST00000298139	p.M387I
ENST00000447079	p.T1195I
ENST00000375687	p.S1231F
ENST00000406134	p.L390F
ENST00000403359	p.M126L
ENST00000401874	p.R1262H
ENST00000278616	p.D126E
ENST00000544455	p.C1265S
ENST00000357654	p.S1266T
ENST00000406134	p.N127S
ENST00000237289	p.F127C
ENST00000234420	p.G39E
ENST00000389301	p.V1287I
ENST00000544455	p.C1290Y
ENST00000381567	p.D132N
ENST00000231790	p.D132H
ENST00000287598	p.E390D
ENST00000375687	p.L1325F
ENST00000256646	p.D1327G
ENST00000389301	p.T1328A
ENST00000263967	p.I391M
ENST00000303115	p.V138I
ENST00000278616	p.H1380Y
ENST00000289081	p.G139E
ENST00000555427	p.R142H
ENST00000334344	p.A1434T
ENST00000234420	p.S144I
ENST00000406134	p.I145M
ENST00000476773	p.G146R
ENST00000457599	p.N1488S
ENST00000287598	p.T40M
ENST00000420246	p.R156H
ENST00000357654	p.L1564P
ENST00000285021	p.L16V
ENST00000355740	p.A16T
ENST00000231790	p.S406N
ENST00000330258	p.F159L
ENST00000357654	p.S1613G
ENST00000357654	p.P1614S
ENST00000357654	p.M1628T
ENST00000341105	p.A164T
ENST00000357654	p.P1637L
ENST00000389301	p.A412V
ENST00000357654	p.M1652I
ENST00000357654	p.L1664P
ENST00000372037	p.P2T
ENST00000355716	p.K17R
ENST00000357654	p.G1706A
ENST00000357654	p.T1720I
ENST00000540549	p.L1721W
ENST00000287647	p.I172M
ENST00000311895	p.R415Q
ENST00000540549	p.I1762V
ENST00000357654	p.Y179C
ENST00000513237	p.H1799R
ENST00000544455	p.R18H
ENST00000357654	p.V1804D
ENST00000380982	p.I417L
ENST00000278616	p.V182L
ENST00000457016	p.V1822D
ENST00000544455	p.N108H
ENST00000265433	p.E185Q
ENST00000278616	p.D1853N
ENST00000357654	p.S186Y
ENST00000389301	p.Q417H
ENST00000358487	p.M186T
ENST00000287647	p.T193A
ENST00000544455	p.Y42C
ENST00000409792	p.P1962L
ENST00000265849	p.R20Q
ENST00000229769	p.S204L
ENST00000406381	p.W422C
ENST00000544455	p.N2113S
ENST00000544455	p.H2116R
ENST00000231790	p.V213M
ENST00000540549	p.V218M
ENST00000231790	p.I219L
ENST00000231790	p.I219V
ENST00000380982	p.T227M
ENST00000423192	p.F4L
ENST00000277541	p.V2285I
ENST00000544455	p.K2339N
ENST00000263121	p.A236G
ENST00000498907	p.A238E
ENST00000301067	p.P2382S
ENST00000544455	p.Q2384K
ENST00000371100	p.A436D
ENST00000355716	p.V241I
ENST00000544455	p.H2440R
ENST00000303115	p.T244I
ENST00000544455	p.K2472T
ENST00000389301	p.K249E
ENST00000375274	p.E44G
ENST00000341105	p.P250A
ENST00000544455	p.T2515I
ENST00000498907	p.A252S
ENST00000389301	p.D252G
ENST00000375128	p.M256V
ENST00000355739	p.Q256R
ENST00000391945	p.I444L
ENST00000355716	p.P262L
ENST00000544455	p.D2665G
ENST00000257555	p.I27L
ENST00000428558	p.E267D
ENST00000231790	p.E268G
ENST00000554435	p.R269S
ENST00000544455	p.A2717S
ENST00000357654	p.K45Q
ENST00000544455	p.V2728I
ENST00000541398	p.E282K
ENST00000544455	p.E2856A
ENST00000330258	p.A29T
ENST00000289081	p.V449M
ENST00000391941	p.D288N
ENST00000540549	p.P29R
ENST00000523241	p.T293I
ENST00000544455	p.I2944F
ENST00000263923	p.V297I
ENST00000378643	p.T297I
ENST00000355112	p.T298M
ENST00000285071	p.E303K
ENST00000287647	p.L456R
ENST00000265849	p.Y318C
ENST00000450313	p.W321C
ENST00000406134	p.G322D
ENST00000231790	p.V326A
ENST00000371100	p.P459R
ENST00000263967	p.A1020V
ENST00000389048	p.A1099T
ENST00000371953	p.A121V
ENST00000389048	p.A1234T
ENST00000337432	p.G126S
ENST00000355774	p.A1394T
ENST00000231790	p.A160V
ENST00000420246	p.A161T
ENST00000544455	p.E462G
ENST00000357654	p.A1752G
ENST00000357654	p.A1823T
ENST00000265849	p.A182T
ENST00000406134	p.A189S
ENST00000356175	p.A2058D
ENST00000406134	p.A207S
ENST00000234420	p.A20V
ENST00000265849	p.P470S
ENST00000257290	p.R340Q
ENST00000234420	p.G25W
ENST00000447712	p.A263V
ENST00000406134	p.A272V
ENST00000353533	p.A279T
ENST00000231790	p.A281V
ENST00000231790	p.A29S
ENST00000406134	p.A2T
ENST00000234420	p.A326V
ENST00000231790	p.A353V
ENST00000263923	p.Q472H
ENST00000406134	p.A370T
ENST00000358487	p.V389M
ENST00000231790	p.A441T
ENST00000406134	p.A45V
ENST00000231790	p.A492T
ENST00000265849	p.A520V
ENST00000265849	p.A572T
ENST00000231790	p.A623S
ENST00000406134	p.A636V
ENST00000234420	p.A787V
ENST00000234420	p.A81T
ENST00000406134	p.A834T
ENST00000406134	p.A848S
ENST00000275493	p.V859I
ENST00000406134	p.A870G
ENST00000355710	p.A883T
ENST00000544455	p.A902V
ENST00000231790	p.A92P
ENST00000234420	p.R1095H
ENST00000231790	p.R127K
ENST00000234420	p.R128L
ENST00000234420	p.R1304K
ENST00000301067	p.A476T
ENST00000353533	p.R134Q
ENST00000555427	p.R151C
ENST00000277541	p.R1608S
ENST00000555427	p.R160W
ENST00000555427	p.R163Q
ENST00000357654	p.R1699Q
ENST00000357654	p.R1699W
ENST00000458205	p.H477Y
ENST00000231790	p.R182G
ENST00000420246	p.R202S
ENST00000257290	p.S478P
ENST00000420246	p.Q273E
ENST00000420246	p.R290H
ENST00000234420	p.R361H
ENST00000234420	p.R378K
ENST00000260947	p.R378S
ENST00000231790	p.R385P
ENST00000231790	p.R389Q
ENST00000342988	p.R420H
ENST00000342988	p.R441P
ENST00000391945	p.R450H
ENST00000265849	p.R469I
ENST00000265849	p.T485K
ENST00000257290	p.R481G
ENST00000231790	p.R487Q
ENST00000231790	p.R522Q
ENST00000234420	p.R644S
ENST00000355774	p.R647C
ENST00000231790	p.R659Q
ENST00000267163	p.R661W
ENST00000269571	p.R678Q
ENST00000376214	p.R734C
ENST00000234420	p.R761K
ENST00000275493	p.R841K
ENST00000257555	p.S487N
ENST00000544455	p.I3412V
ENST00000358273	p.R873C
ENST00000355710	p.R972G
ENST00000355774	p.N1007S
ENST00000342788	p.N181S
ENST00000285021	p.R492H
ENST00000234420	p.N21S
ENST00000234420	p.N223S
ENST00000544455	p.N319T
ENST00000406870	p.A493T
ENST00000406134	p.N361S
ENST00000307102	p.N382H
ENST00000264033	p.N454D
ENST00000231790	p.N468D
ENST00000355774	p.N499S
ENST00000406134	p.N547S
ENST00000357654	p.R496C
ENST00000265849	p.N554H
ENST00000288602	p.N581D
ENST00000406134	p.N596S
ENST00000231790	p.N635S
ENST00000231790	p.N645S
ENST00000406134	p.N835H
ENST00000263967	p.D1017G
ENST00000389048	p.D1091N
ENST00000256474	p.D121G
ENST00000372110	p.S498F
ENST00000389048	p.D1349H
ENST00000357654	p.D1692N
ENST00000357654	p.D1733G
ENST00000358273	p.D176E
ENST00000285021	p.A499V
ENST00000342788	p.D245G
ENST00000555427	p.D294H
ENST00000371953	p.D301N
ENST00000441310	p.G501R
ENST00000554581	p.D32Y
ENST00000231790	p.D418E
ENST00000231790	p.D485H
ENST00000406134	p.D487E
ENST00000342988	p.D493H
ENST00000265849	p.D502E
ENST00000389301	p.G501S
ENST00000265849	p.D510E
ENST00000265849	p.D526E
ENST00000342988	p.D537H
ENST00000355710	p.D631A
ENST00000355710	p.D631N
ENST00000355710	p.D631G
ENST00000544455	p.D720N
ENST00000234420	p.S503C
ENST00000234420	p.D803G
ENST00000555427	p.D84E
ENST00000263923	p.C482R
ENST00000441476	p.S350Y
ENST00000267163	p.C712R
ENST00000371953	p.Q110R
ENST00000374690	p.Q120E
ENST00000357654	p.Q1409L
ENST00000355774	p.Q24E
ENST00000544455	p.I505T
ENST00000338641	p.Q324L
ENST00000406134	p.Q419K
ENST00000231790	p.Q542L
ENST00000554581	p.Q59E
ENST00000263967	p.Q60K
ENST00000406134	p.Q629R
ENST00000234420	p.V509A
ENST00000234420	p.Q698E
ENST00000234420	p.E1163V
ENST00000263967	p.E116K
ENST00000234420	p.E1254D
ENST00000399503	p.E1286V
ENST00000265849	p.T511A
ENST00000234420	p.E1310D
ENST00000355774	p.E1451K
ENST00000357654	p.E1586G
ENST00000231790	p.E199Q
ENST00000234420	p.E221D
ENST00000265849	p.T511M
ENST00000311936	p.E31K
ENST00000231790	p.E433Q
ENST00000231790	p.E460A
ENST00000265849	p.E473V
ENST00000288602	p.E501G
ENST00000231790	p.E515K
ENST00000231790	p.E523D
ENST00000263967	p.E52K
ENST00000231790	p.E53A
ENST00000406134	p.E561K
ENST00000265849	p.E583K
ENST00000355774	p.E624Q
ENST00000367922	p.E655K
ENST00000231790	p.E663D
ENST00000231790	p.E663G
ENST00000231790	p.E668K
ENST00000234420	p.E675D
ENST00000278616	p.G514D
ENST00000355710	p.E762Q
ENST00000406134	p.E809K
ENST00000288135	p.E839K
ENST00000406134	p.E886G
ENST00000541158	p.P52T
ENST00000371953	p.G129A
ENST00000418115	p.G14V
ENST00000420246	p.G199R
ENST00000406134	p.G203R
ENST00000544455	p.G2044V
ENST00000337432	p.G264S
ENST00000357654	p.G275D
ENST00000450313	p.R517Q
ENST00000234420	p.G289D
ENST00000269305	p.G334R
ENST00000231790	p.G454R
ENST00000406134	p.G508S
ENST00000375499	p.G53E
ENST00000234420	p.G54A
ENST00000275493	p.R521K
ENST00000263967	p.G912R
ENST00000355774	p.G933C
ENST00000355774	p.G981S
ENST00000261584	p.G998E
ENST00000298552	p.H105R
ENST00000428558	p.R522C
ENST00000420246	p.H168N
ENST00000367922	p.H246R
ENST00000231790	p.H264R
ENST00000420246	p.H297N
ENST00000231790	p.H381Y
ENST00000265849	p.H479Q
ENST00000257290	p.H570R
ENST00000342788	p.H618P
ENST00000263967	p.H701P
ENST00000428558	p.R522H
ENST00000234420	p.I1054F
ENST00000544455	p.I1151M
ENST00000389048	p.I1183T
ENST00000371953	p.I122V
ENST00000555427	p.I155T
ENST00000406134	p.I169V
ENST00000406134	p.I216V
ENST00000406134	p.I237V
ENST00000234420	p.I251V
ENST00000231790	p.I25T
ENST00000356175	p.I2660V
ENST00000423192	p.D525N
ENST00000263967	p.I31M
ENST00000231790	p.I32V
ENST00000258439	p.I41V
ENST00000234420	p.I425V
ENST00000265849	p.I462L
ENST00000355193	p.W526S
ENST00000265849	p.I462M
ENST00000265849	p.I462T
ENST00000265849	p.I508L
ENST00000257290	p.I562M
ENST00000265849	p.I590L
ENST00000265849	p.I629L
ENST00000231790	p.I655T
ENST00000234420	p.I669T
ENST00000423192	p.E527K
ENST00000231790	p.I68V
ENST00000406134	p.I708N
ENST00000234420	p.I725M
ENST00000406134	p.I770V
ENST00000275493	p.I853T
ENST00000234420	p.I886V
ENST00000233146	p.I930M
ENST00000355739	p.C529S
ENST00000389048	p.L1204F
ENST00000256474	p.L128F
ENST00000234420	p.L1354Q
ENST00000231790	p.L135V
ENST00000234420	p.L147H
ENST00000544455	p.L1522F
ENST00000231790	p.L166F
ENST00000396946	p.E530D
ENST00000544455	p.L209F
ENST00000374690	p.L272F
ENST00000231790	p.L272V
ENST00000554581	p.L362R
ENST00000412167	p.M537L
ENST00000234420	p.L396V
ENST00000231790	p.L400V
ENST00000371953	p.L42R
ENST00000265849	p.L468V
ENST00000257290	p.L507P
ENST00000231790	p.L582V
ENST00000265849	p.L585I
ENST00000322088	p.F54V
ENST00000303115	p.I356V
ENST00000231790	p.L588P
ENST00000265849	p.L594F
ENST00000265849	p.L594V
ENST00000288602	p.L597V
ENST00000231790	p.L622H
ENST00000275493	p.L688P
ENST00000257290	p.L705P
ENST00000231790	p.L724M
ENST00000231790	p.L729V
ENST00000298139	p.K541N
ENST00000263967	p.K111N
ENST00000371953	p.K125R
ENST00000234420	p.K185E
ENST00000234420	p.K187T
ENST00000337652	p.T546A
ENST00000406134	p.K248E
ENST00000231790	p.K286Q
ENST00000358487	p.K310R
ENST00000554581	p.K39N
ENST00000338641	p.K413E
ENST00000231790	p.K416E
ENST00000375274	p.D55H
ENST00000231790	p.K443Q
ENST00000231790	p.K461N
ENST00000358487	p.K517R
ENST00000265849	p.K581E
ENST00000234420	p.K610N
ENST00000231790	p.K618R
ENST00000340107	p.K650R
ENST00000335508	p.K700R
ENST00000234420	p.K728T
ENST00000357654	p.N550H
ENST00000231790	p.K751R
ENST00000298552	p.K82T
ENST00000447079	p.K975E
ENST00000234420	p.M1202T
ENST00000406134	p.M141V
ENST00000357654	p.M1775V
ENST00000231790	p.M458K
ENST00000288135	p.M541L
ENST00000406134	p.M592V
ENST00000265849	p.M600I
ENST00000261769	p.V556M
ENST00000376214	p.M713I
ENST00000355710	p.M918V
ENST00000355710	p.M980T
ENST00000544455	p.F2406L
ENST00000234420	p.F340S
ENST00000402690	p.F346V
ENST00000440486	p.F384L
ENST00000406134	p.F519L
ENST00000234420	p.F985L
ENST00000234420	p.P1073R
ENST00000234420	p.P1073S
ENST00000234420	p.P1082L
ENST00000234420	p.P1087R
ENST00000234420	p.P1087T
ENST00000357654	p.P1806A
ENST00000256474	p.P25L
ENST00000406134	p.P336S
ENST00000261584	p.Q559R
ENST00000307102	p.P387S
ENST00000231790	p.P403S
ENST00000234420	p.P42S
ENST00000554581	p.P42T
ENST00000231790	p.P435L
ENST00000265849	p.P446S
ENST00000420246	p.P47S
