# Supplementary material for: CDMPred: a tool for predicting cancer driver missense mutations with high-quality passenger mutations
Source: PeerJ. 2024 Sep 6;12:e17991. doi: 10.7717/peerj.17991 (PMC11382650; doi:10.7717/peerj.17991)
Supplement: File S2 — Raw data for testing CDMPred and other state-of-the-art methods. [file peerj-12-17991-s008.xlsx]

## Sheet: Positive samples
Transcript_ID	AA_Change
ENST00000361445	p.R2505P
ENST00000361445	p.I2500M
ENST00000361445	p.I2500F
ENST00000361445	p.E2419K
ENST00000361445	p.Q2223K
ENST00000361445	p.S2215Y
ENST00000361445	p.S2215F
ENST00000361445	p.S2215T
ENST00000361445	p.P2213S
ENST00000361445	p.F2108L
ENST00000361445	p.E2014K
ENST00000361445	p.H1968Y
ENST00000361445	p.C1483W
ENST00000361445	p.C1483Y
ENST00000361445	p.C1483F
ENST00000361445	p.C1483R
ENST00000361445	p.L1460P
ENST00000376592	p.A222V
ENST00000358432	p.R721Q
ENST00000358432	p.G391R
ENST00000374632	p.G787R
ENST00000373103	p.T618I
ENST00000373103	p.T615A
ENST00000271450	p.H167R
ENST00000367969	p.F212V
ENST00000367921	p.L63V
ENST00000367922	p.L63V
ENST00000367921	p.L239R
ENST00000367922	p.G253C
ENST00000367921	p.G253C
ENST00000367922	p.G505S
ENST00000367921	p.G505S
ENST00000367921	p.I638F
ENST00000367922	p.I638F
ENST00000367921	p.S768R
ENST00000367922	p.S768R
ENST00000367922	p.G774V
ENST00000367921	p.G774V
ENST00000366814	p.K28M
ENST00000366813	p.G34R
ENST00000281043	p.P44L
ENST00000264709	p.R882P
ENST00000264709	p.R882H
ENST00000264709	p.R882L
ENST00000264709	p.R882C
ENST00000264709	p.R882G
ENST00000264709	p.R882S
ENST00000389048	p.I1250T
ENST00000389048	p.R1192P
ENST00000389048	p.V1180L
ENST00000389048	p.I1171T
ENST00000402219	p.N233Y
ENST00000401558	p.E571V
ENST00000401558	p.E571A
ENST00000401558	p.E571K
ENST00000263640	p.G328E
ENST00000263640	p.G328V
ENST00000263640	p.R258M
ENST00000263640	p.R258G
ENST00000397062	p.E79D
ENST00000335508	p.K700N
ENST00000335508	p.K700I
ENST00000335508	p.K700T
ENST00000335508	p.K700R
ENST00000335508	p.K700Q
ENST00000415913	p.R132H
ENST00000415913	p.R132C
ENST00000342788	p.E872K
ENST00000342788	p.R544W
ENST00000342788	p.E542K
ENST00000342788	p.E452K
ENST00000342788	p.R393W
ENST00000342788	p.E317K
ENST00000273064	p.S87P
ENST00000273064	p.S87C
ENST00000273064	p.P131S
ENST00000273064	p.P131L
ENST00000251849	p.L613V
ENST00000251849	p.T491I
ENST00000442415	p.W388S
ENST00000251849	p.V263A
ENST00000442415	p.P261L
ENST00000442415	p.P261A
ENST00000442415	p.P261S
ENST00000442415	p.S259F
ENST00000251849	p.S257L
ENST00000251849	p.S257W
ENST00000442415	p.S257P
ENST00000417037	p.L273P
ENST00000349496	p.G34A
ENST00000349496	p.T40P
ENST00000431929	p.Y42C
ENST00000422781	p.Y42S
ENST00000431929	p.Y42F
ENST00000431929	p.E40Q
ENST00000418115	p.E40K
ENST00000431929	p.R5Q
ENST00000431929	p.R5L
ENST00000431929	p.R5W
ENST00000341105	p.R398W
ENST00000341105	p.T354M
ENST00000263967	p.R38L
ENST00000263967	p.N345H
ENST00000263967	p.C420G
ENST00000263967	p.E453D
ENST00000263967	p.M1043L
ENST00000352904	p.R248C
ENST00000340107	p.R248C
ENST00000352904	p.S249C
ENST00000340107	p.S249C
ENST00000340107	p.G372C
ENST00000260795	p.S371C
ENST00000340107	p.S373C
ENST00000340107	p.Y375C
ENST00000260795	p.Y373C
ENST00000260795	p.A391E
ENST00000340107	p.V555M
ENST00000340107	p.Y650S
ENST00000340107	p.Y650F
ENST00000340107	p.K652Q
ENST00000260795	p.K650Q
ENST00000260795	p.K650E
ENST00000260795	p.G697C
ENST00000340107	p.G699C
ENST00000257290	p.P577S
ENST00000257290	p.V658A
ENST00000257290	p.G853D
ENST00000288135	p.K642N
ENST00000288135	p.N655S
ENST00000263923	p.A1065T
ENST00000263923	p.R961W
ENST00000263923	p.D717V
ENST00000273854	p.G582E
ENST00000237612	p.Q141K
ENST00000281708	p.R465P
ENST00000281708	p.R465G
ENST00000303115	p.S185C
ENST00000396611	p.G376R
ENST00000396611	p.D560Y
ENST00000274335	p.N564D
ENST00000396611	p.N564D
ENST00000396611	p.N564K
ENST00000292408	p.Y367C
ENST00000292408	p.N535K
ENST00000292408	p.V550E
ENST00000328488	p.K28M
ENST00000328488	p.K28E
ENST00000375331	p.D89N
ENST00000369798	p.D697Y
ENST00000368508	p.L2155S
ENST00000368508	p.G2101A
ENST00000368508	p.G2032R
ENST00000368508	p.L2026M
ENST00000206249	p.E380Q
ENST00000206249	p.S463P
ENST00000206249	p.V534E
ENST00000206249	p.P535H
ENST00000206249	p.L536R
ENST00000206249	p.Y537N
ENST00000206249	p.Y537S
ENST00000206249	p.Y537C
ENST00000206249	p.D538G
ENST00000348035	p.P29T
ENST00000348035	p.P29S
ENST00000356142	p.P29S
ENST00000356142	p.P29L
ENST00000442591	p.R108K
ENST00000342916	p.A289T
ENST00000342916	p.A289D
ENST00000342916	p.A289V
ENST00000275493	p.R451C
ENST00000275493	p.G465R
ENST00000275493	p.S492G
ENST00000342916	p.G598A
ENST00000342916	p.G598V
ENST00000275493	p.E749Q
ENST00000275493	p.C797S
ENST00000265724	p.S893A
ENST00000265724	p.S893T
ENST00000318493	p.R988C
ENST00000318493	p.V1110I
ENST00000397752	p.D1228N
ENST00000288602	p.K601T
ENST00000496384	p.T207I
ENST00000288602	p.G596V
ENST00000496384	p.F203L
ENST00000288602	p.D594A
ENST00000288602	p.N581T
ENST00000288602	p.N581H
ENST00000496384	p.G77V
ENST00000460911	p.Y641N
ENST00000460911	p.Y641H
ENST00000320356	p.E641V
ENST00000320356	p.E641A
ENST00000262187	p.Y35C
ENST00000262187	p.Y35N
ENST00000341462	p.K656N
ENST00000425967	p.K687N
ENST00000341462	p.K656E
ENST00000425967	p.K687E
ENST00000425967	p.N577K
ENST00000341462	p.N546K
ENST00000425967	p.N577D
ENST00000425967	p.M546V
ENST00000425967	p.P283T
ENST00000425967	p.S158L
ENST00000284811	p.Y79S
ENST00000284811	p.Y79F
ENST00000284811	p.Y79N
ENST00000377970	p.P57S
ENST00000377970	p.P58L
ENST00000377970	p.A59V
ENST00000377970	p.T73P
ENST00000377970	p.T73I
ENST00000377970	p.S77F
ENST00000377970	p.N101T
ENST00000377970	p.P260A
ENST00000446177	p.P114L
ENST00000304494	p.P114T
ENST00000361570	p.R163L
ENST00000361570	p.R139L
ENST00000498124	p.H83Q
ENST00000446177	p.H83R
ENST00000446177	p.H83Y
ENST00000304494	p.H83D
ENST00000361570	p.A138V
ENST00000446177	p.R80Q
ENST00000498124	p.Q50H
ENST00000380036	p.G743A
ENST00000373547	p.R264C
ENST00000451402	p.R301C
ENST00000372348	p.E255K
ENST00000372348	p.M263V
ENST00000372348	p.L267V
ENST00000372348	p.G269E
ENST00000372348	p.Q271H
ENST00000372348	p.Y272H
ENST00000372348	p.Y272F
ENST00000372348	p.E274K
ENST00000372348	p.E274V
ENST00000372348	p.F302V
ENST00000372348	p.V318L
ENST00000372348	p.T334A
ENST00000372348	p.T334I
ENST00000372348	p.F336I
ENST00000372348	p.F336V
ENST00000372348	p.F336C
ENST00000372348	p.F336L
ENST00000372348	p.M370T
ENST00000372348	p.E374G
ENST00000372348	p.F378V
ENST00000372348	p.F378L
ENST00000372348	p.F378I
ENST00000372348	p.F378C
ENST00000372348	p.H415R
ENST00000481739	p.S427F
ENST00000481739	p.S427Y
ENST00000340058	p.C609Y
ENST00000340058	p.C618R
ENST00000340058	p.C620Y
ENST00000340058	p.C630R
ENST00000340058	p.C634R
ENST00000340058	p.C634Y
ENST00000340058	p.C634W
ENST00000340058	p.Y791F
ENST00000355710	p.V804L
ENST00000340058	p.S891A
ENST00000340058	p.M918T
ENST00000343289	p.D407A
ENST00000343289	p.R367Q
ENST00000343289	p.K359Q
ENST00000457416	p.K660E
ENST00000457416	p.K659N
ENST00000369056	p.K659E
ENST00000457416	p.N639K
ENST00000357555	p.N549K
ENST00000357555	p.N549T
ENST00000457416	p.L618M
ENST00000457416	p.E566G
ENST00000358487	p.E565A
ENST00000457416	p.V565I
ENST00000457416	p.N550K
ENST00000369056	p.N550H
ENST00000457416	p.N550H
ENST00000369056	p.I549L
ENST00000457416	p.I548V
ENST00000457416	p.M538I
ENST00000457416	p.M536I
ENST00000369056	p.T525A
ENST00000351936	p.C382Y
ENST00000369058	p.C383Y
ENST00000369058	p.C383R
ENST00000369056	p.Y382H
ENST00000457416	p.Y382H
ENST00000457416	p.Y376C
ENST00000369058	p.D375G
ENST00000457416	p.S373C
ENST00000351936	p.C342Y
ENST00000457416	p.S320C
ENST00000457416	p.K310R
ENST00000457416	p.W290C
ENST00000457416	p.P253R
ENST00000457416	p.S252W
ENST00000351936	p.S252W
ENST00000397594	p.A146V
ENST00000397594	p.A146T
ENST00000311189	p.A146P
ENST00000451590	p.Q61H
ENST00000311189	p.Q61H
ENST00000311189	p.Q61L
ENST00000397594	p.Q61P
ENST00000397594	p.Q61R
ENST00000311189	p.Q61R
ENST00000311189	p.Q61P
ENST00000311189	p.Q61E
ENST00000397594	p.Q61K
ENST00000311189	p.Q61K
ENST00000397594	p.G13D
ENST00000397594	p.G13V
ENST00000397594	p.G13A
ENST00000311189	p.G13V
ENST00000451590	p.G13D
ENST00000397594	p.G13R
ENST00000397594	p.G13C
ENST00000311189	p.G13C
ENST00000311189	p.G13S
ENST00000311189	p.G13R
ENST00000397594	p.G13S
ENST00000397594	p.G12D
ENST00000397594	p.G12V
ENST00000397594	p.G12A
ENST00000311189	p.G12V
ENST00000311189	p.G12D
ENST00000311189	p.G12R
ENST00000397594	p.G12C
ENST00000397594	p.G12R
ENST00000397594	p.G12S
ENST00000311189	p.G12C
ENST00000447869	p.F323L
ENST00000322535	p.H666P
ENST00000322535	p.E700G
ENST00000398606	p.I105V
ENST00000278616	p.N2875H
ENST00000256078	p.A146V
ENST00000256078	p.A146P
ENST00000256078	p.A146T
ENST00000256078	p.K117N
ENST00000256078	p.Q61H
ENST00000256078	p.Q61L
ENST00000256078	p.Q61R
ENST00000256078	p.Q61P
ENST00000256078	p.Q61K
ENST00000256078	p.Q61E
ENST00000256078	p.A59T
ENST00000256078	p.Q22K
ENST00000256078	p.L19F
ENST00000256078	p.G13V
ENST00000256078	p.G13A
ENST00000256078	p.G13D
ENST00000256078	p.G13C
ENST00000256078	p.G13R
ENST00000256078	p.G13S
ENST00000256078	p.G12V
ENST00000256078	p.G12A
ENST00000256078	p.G12D
ENST00000256078	p.G12C
ENST00000256078	p.G12R
ENST00000256078	p.G12S
ENST00000267101	p.V104M
ENST00000267101	p.V104L
ENST00000267101	p.P262H
ENST00000267101	p.G284R
ENST00000267101	p.D297Y
ENST00000267101	p.D297N
ENST00000267101	p.D297V
ENST00000267101	p.Q809R
ENST00000257904	p.R24H
ENST00000312990	p.R24L
ENST00000312990	p.R24S
ENST00000257904	p.R24C
ENST00000320574	p.V411L
ENST00000320574	p.P286R
ENST00000320574	p.P286H
ENST00000320574	p.P286S
ENST00000380982	p.Y842C
ENST00000380982	p.Y842H
ENST00000380982	p.D839G
ENST00000380982	p.I836M
ENST00000380982	p.I836S
ENST00000380982	p.I836L
ENST00000380982	p.I836V
ENST00000380982	p.I836F
ENST00000380982	p.D835E
ENST00000380982	p.D835V
ENST00000380982	p.D835A
ENST00000380982	p.D835Y
ENST00000380982	p.D835H
ENST00000380982	p.D835N
ENST00000380982	p.F691L
ENST00000380982	p.I687F
ENST00000380982	p.N676K
ENST00000380982	p.N676D
ENST00000380982	p.D651G
ENST00000380982	p.G619C
ENST00000380982	p.V592A
ENST00000537084	p.Y591D
ENST00000380982	p.Y572C
ENST00000407796	p.Q79K
ENST00000407796	p.E17K
ENST00000261609	p.L755S
ENST00000261609	p.A309G
ENST00000448395	p.S24F
ENST00000307102	p.F53V
ENST00000307102	p.F53I
ENST00000307102	p.F53L
ENST00000307102	p.K57T
ENST00000307102	p.I99T
ENST00000307102	p.I103N
ENST00000307102	p.I111N
ENST00000307102	p.H119P
ENST00000307102	p.E120D
ENST00000307102	p.V211D
ENST00000307102	p.L215P
ENST00000268058	p.A216V
ENST00000268058	p.L218P
ENST00000320623	p.P187S
ENST00000359376	p.R665W
ENST00000359376	p.L845F
ENST00000455263	p.E286G
ENST00000359597	p.E286V
ENST00000359597	p.E286K
ENST00000455263	p.E286Q
ENST00000455263	p.R282Q
ENST00000455263	p.R282P
ENST00000455263	p.R282W
ENST00000455263	p.R282G
ENST00000455263	p.D281A
ENST00000455263	p.R280K
ENST00000455263	p.R280T
ENST00000455263	p.R280I
ENST00000455263	p.R280G
ENST00000455263	p.C275Y
ENST00000455263	p.C275F
ENST00000455263	p.C275R
ENST00000455263	p.V274D
ENST00000455263	p.V274G
ENST00000455263	p.V274A
ENST00000455263	p.V274F
ENST00000455263	p.V274L
ENST00000455263	p.R273L
ENST00000455263	p.R273C
ENST00000455263	p.R273S
ENST00000455263	p.V272E
ENST00000455263	p.V272M
ENST00000455263	p.F270S
ENST00000455263	p.F270C
ENST00000455263	p.F270I
ENST00000455263	p.F270V
ENST00000359597	p.I255N
ENST00000359597	p.I255F
ENST00000413465	p.R249T
ENST00000413465	p.R249G
ENST00000413465	p.R249W
ENST00000413465	p.S241A
ENST00000413465	p.M237K
ENST00000413465	p.M237V
ENST00000269305	p.Y236N
ENST00000413465	p.Y234C
ENST00000413465	p.Y234S
ENST00000413465	p.Y234H
ENST00000413465	p.Y234N
ENST00000413465	p.Y234D
ENST00000413465	p.H214R
ENST00000413465	p.H214L
ENST00000413465	p.Y205C
ENST00000413465	p.Y205F
ENST00000455263	p.Y205S
ENST00000413465	p.Y205N
ENST00000455263	p.Y205D
ENST00000413465	p.Y205H
ENST00000413465	p.R196P
ENST00000413465	p.C176W
ENST00000413465	p.C176F
ENST00000413465	p.C176Y
ENST00000413465	p.C176G
ENST00000413465	p.C176R
ENST00000413465	p.R175H
ENST00000413465	p.R175G
ENST00000413465	p.R175C
ENST00000413465	p.P151R
ENST00000413465	p.P151H
ENST00000413465	p.P151S
ENST00000413465	p.P151A
ENST00000604348	p.T125M
ENST00000413465	p.T125R
ENST00000413465	p.T125K
ENST00000413465	p.T125P
ENST00000269305	p.P72R
ENST00000269305	p.P47S
ENST00000268766	p.A197P
ENST00000584450	p.R678Q
ENST00000269571	p.L755W
ENST00000269571	p.L785P
ENST00000269571	p.L866M
ENST00000393331	p.F133L
ENST00000347630	p.F133S
ENST00000347630	p.F133C
ENST00000347630	p.F133I
ENST00000347630	p.F133V
ENST00000393331	p.W131C
ENST00000347630	p.W131S
ENST00000393331	p.W131R
ENST00000347630	p.W131G
ENST00000393331	p.F102L
ENST00000347630	p.F102C
ENST00000347630	p.F102V
ENST00000347630	p.Y87S
ENST00000347630	p.Y87C
ENST00000347630	p.Y87N
ENST00000399799	p.P1193S
ENST00000282030	p.G870S
ENST00000342988	p.R361P
ENST00000342988	p.G386A
ENST00000326873	p.L67P
ENST00000585851	p.R86G
ENST00000326873	p.K108R
ENST00000326873	p.D176N
ENST00000326873	p.I177N
ENST00000326873	p.D194E
ENST00000326873	p.W308C
ENST00000326873	p.T363I
ENST00000262948	p.N126D
ENST00000262948	p.C125S
ENST00000262948	p.Q60P
ENST00000262948	p.F57L
ENST00000262948	p.F57V
ENST00000262948	p.L46F
ENST00000262948	p.V35M
ENST00000534444	p.P132T
ENST00000534444	p.I87T
ENST00000222254	p.N561D
ENST00000392038	p.R371H
ENST00000392038	p.S302G
ENST00000262887	p.R194W
ENST00000391945	p.K751Q
ENST00000246784	p.R18W
ENST00000377340	p.S128F
ENST00000371100	p.R844C
ENST00000354359	p.R202C
ENST00000354359	p.R202H
ENST00000371100	p.R844L
ENST00000371100	p.R844H
ENST00000354359	p.R202L
ENST00000354359	p.Q228L
ENST00000380276	p.Q157R
ENST00000380276	p.Q157P
ENST00000215832	p.E322K
ENST00000382580	p.V438F
ENST00000382580	p.D390A
ENST00000377045	p.S214A
ENST00000377045	p.S214C
ENST00000377045	p.S214F
ENST00000374690	p.F877L
ENST00000333646	p.L1224F
ENST00000333646	p.L1224V
ENST00000308731	p.C481S
ENST00000372880	p.E41K

## Sheet: Negative samples
Transcript_ID	AA_Change
ENST00000340107	p.R572G
ENST00000261584	p.P5S
ENST00000357654	p.P633S
ENST00000231790	p.P640L
ENST00000231790	p.P640S
ENST00000406134	p.P696L
ENST00000261584	p.P864S
ENST00000261584	p.P918S
ENST00000357654	p.S127N
ENST00000375499	p.H57R
ENST00000544455	p.S1424C
ENST00000357654	p.S1577P
ENST00000357654	p.S1631N
ENST00000357654	p.S1651F
ENST00000544455	p.S1871N
ENST00000544455	p.S2414L
ENST00000544455	p.S2483N
ENST00000544455	p.S2835P
ENST00000544455	p.S3020C
ENST00000357654	p.S454N
ENST00000281708	p.S462Y
ENST00000309486	p.S628R
ENST00000309486	p.S632N
ENST00000406134	p.S723F
ENST00000264033	p.S80N
ENST00000231790	p.S93G
ENST00000261584	p.S951P
ENST00000231790	p.T116K
ENST00000231790	p.T117M
ENST00000357654	p.T1249S
ENST00000357654	p.T1310K
ENST00000309486	p.T1349P
ENST00000544455	p.T1388N
ENST00000357654	p.T1485I
ENST00000380982	p.T167A
ENST00000544455	p.T1723P
ENST00000357654	p.T1773S
ENST00000357654	p.T1852S
ENST00000357654	p.T276R
ENST00000544455	p.T3211K
ENST00000330062	p.T331M
ENST00000357654	p.T539M
ENST00000261769	p.A592T
ENST00000278715	p.D359N
ENST00000357654	p.W1782R
ENST00000231790	p.W666R
ENST00000231790	p.Y126N
ENST00000309486	p.Y1522C
ENST00000544455	p.Y3092C
ENST00000544455	p.D596H
ENST00000380982	p.Y364H
ENST00000357654	p.V1088D
ENST00000261584	p.V1103M
ENST00000357654	p.V1181I
ENST00000544455	p.V1610M
ENST00000357654	p.V1653M
ENST00000357654	p.V1696L
ENST00000357654	p.V1736A
ENST00000357654	p.V1741G
ENST00000357654	p.E597K
ENST00000357654	p.V1808A
ENST00000357654	p.V1809A
ENST00000357654	p.V1809F
ENST00000357654	p.V1833M
ENST00000380982	p.V194M
ENST00000544455	p.V2138F
ENST00000357654	p.V271M
ENST00000544455	p.T598A
ENST00000330062	p.V294M
ENST00000264033	p.V430M
ENST00000257290	p.V469A
ENST00000406134	p.V470E
ENST00000309486	p.V627I
ENST00000340107	p.D630N
ENST00000440486	p.V677I
ENST00000544455	p.G602R
ENST00000269571	p.V750E
ENST00000406381	p.L777S
ENST00000357654	p.V788I
ENST00000231790	p.P603R
ENST00000344849	p.S615L
ENST00000544455	p.P2639A
ENST00000544455	p.P3039L
ENST00000544455	p.Q2925H
ENST00000544455	p.R2488G
ENST00000544455	p.R2488S
ENST00000544455	p.R2678G
ENST00000544455	p.R2787C
ENST00000544455	p.R2991H
ENST00000544455	p.S2509N
ENST00000413689	p.L618F
ENST00000544455	p.S2522F
ENST00000544455	p.S2782N
ENST00000544455	p.S2988G
ENST00000544455	p.S3058G
ENST00000544455	p.S3123G
ENST00000544455	p.V2652M
ENST00000544455	p.V3081A
ENST00000544455	p.Y3035C
ENST00000544455	p.Y3035S
ENST00000264731	p.R379C
ENST00000357654	p.A622V
ENST00000357654	p.D642H
ENST00000357654	p.D369N
ENST00000231790	p.I655V
ENST00000357654	p.D67Y
ENST00000357654	p.L668F
ENST00000413689	p.Q692K
ENST00000357654	p.D695N
ENST00000309486	p.N723D
ENST00000258439	p.G73R
ENST00000544455	p.A75P
ENST00000544455	p.M784V
ENST00000355710	p.Y791F
ENST00000357654	p.P798L
ENST00000357654	p.Q804H
ENST00000261769	p.D805N
ENST00000544455	p.D806H
ENST00000544455	p.P375S
ENST00000357654	p.K820E
ENST00000219476	p.L826M
ENST00000355710	p.P841L
ENST00000357654	p.R841Q
ENST00000357654	p.E842G
ENST00000357654	p.Y856H
ENST00000357654	p.K862E
ENST00000357654	p.P871L
ENST00000357654	p.G890V
ENST00000366560	p.Q376P
ENST00000355481	p.G893S
ENST00000544455	p.V894I
ENST00000545968	p.V896M
ENST00000258439	p.V90M
ENST00000357654	p.I925L
ENST00000544455	p.L929S
ENST00000355481	p.A933T
ENST00000357654	p.P334L
ENST00000544455	p.N987I
ENST00000357654	p.S988A
ENST00000544455	p.N991D
ENST00000357654	p.M1008V
ENST00000544455	p.T1011R
ENST00000544455	p.L1019V
ENST00000357654	p.I379M
ENST00000357654	p.R1028H
ENST00000357654	p.E1038A
ENST00000357654	p.E1038G
ENST00000357654	p.I1044V
ENST00000430669	p.T1052M
ENST00000309486	p.E1060A
ENST00000309486	p.S1101N
ENST00000544455	p.N1102Y
ENST00000309486	p.K1109N
ENST00000544455	p.M1149V
ENST00000544455	p.S1172L
ENST00000357654	p.K1183R
ENST00000544455	p.R1190W
ENST00000544455	p.G1194D
ENST00000357654	p.R1203Q
ENST00000357654	p.E1214K
ENST00000309486	p.E1219D
ENST00000544455	p.N1228D
ENST00000309486	p.N1236K
ENST00000357654	p.I124V
ENST00000357654	p.P1238L
ENST00000309486	p.V1247I
ENST00000309486	p.E1250K
ENST00000357654	p.L1267S
ENST00000544455	p.D1280V
ENST00000309486	p.E1282V
ENST00000357654	p.S1301R
ENST00000544455	p.V1306I
ENST00000413689	p.L1308F
ENST00000357654	p.N132K
ENST00000357654	p.E1346K
ENST00000357654	p.T1349M
ENST00000544455	p.I1349T
ENST00000544455	p.T1354M
ENST00000357654	p.M1361L
ENST00000544455	p.K1286E
ENST00000544455	p.C1365Y
ENST00000357654	p.V1378I
ENST00000544455	p.Q1396R
ENST00000357654	p.M1400V
ENST00000357654	p.H1402Y
ENST00000357654	p.L1407P
ENST00000309486	p.M1411T
ENST00000457016	p.M1413V
ENST00000359596	p.Y3933C
ENST00000544455	p.T1414M
ENST00000357654	p.E1419Q
ENST00000544455	p.D1420Y
ENST00000357654	p.P142H
ENST00000309486	p.E143K
ENST00000357654	p.R1443G
ENST00000309486	p.S1448G
ENST00000155840	p.K393N
ENST00000544455	p.T3349A
ENST00000357654	p.N1468H
ENST00000357654	p.L147F
ENST00000357654	p.S1486C
ENST00000357654	p.S1497A
ENST00000357654	p.S1512I
ENST00000544455	p.F1524V
ENST00000544455	p.G1529R
ENST00000309486	p.V1534M
ENST00000309486	p.D1546N
ENST00000309486	p.D1546Y
ENST00000357654	p.Q155E
ENST00000357654	p.T1561I
ENST00000355481	p.I1571V
ENST00000261590	p.V158G
ENST00000357654	p.R1589P
ENST00000309486	p.L165P
ENST00000357654	p.M1652T
ENST00000357654	p.F1662S
ENST00000406134	p.D167H
ENST00000357654	p.A1669S
ENST00000544455	p.P168T
ENST00000355481	p.R1679H
ENST00000357654	p.E1682K
ENST00000544455	p.K1690N
ENST00000372037	p.E415K
ENST00000309486	p.R170W
ENST00000357654	p.T1720A
ENST00000544455	p.S1733F
ENST00000366560	p.P174R
ENST00000357654	p.R1751Q
ENST00000357654	p.C1767S
ENST00000544455	p.G1771D
ENST00000357654	p.W1782C
ENST00000413689	p.S1787N
ENST00000357654	p.E1794D
ENST00000357654	p.P1812R
ENST00000544455	p.P1819S
ENST00000357654	p.I1858L
ENST00000357654	p.P1859R
ENST00000357654	p.H1862L
ENST00000399655	p.R1880Q
ENST00000544455	p.N1880K
ENST00000544455	p.L1904V
ENST00000413689	p.A1904V
ENST00000309486	p.V191I
ENST00000544455	p.T1915M
ENST00000544455	p.H1918Y
ENST00000544455	p.I1929V
ENST00000413689	p.V1951L
ENST00000544455	p.R2034C
ENST00000544455	p.N2048I
ENST00000544455	p.H2074N
ENST00000261584	p.P210L
ENST00000544455	p.R2108H
ENST00000415950	p.R214Q
ENST00000420246	p.P222L
ENST00000544455	p.T2250A
ENST00000355481	p.R3366H
ENST00000457016	p.A2274V
ENST00000544455	p.I2285V
ENST00000357654	p.T231M
ENST00000457016	p.I2329V
ENST00000397752	p.G24E
ENST00000544455	p.N2436I
ENST00000309486	p.D245V
ENST00000357654	p.L246V
ENST00000457016	p.P2467T
ENST00000544455	p.I2490T
ENST00000357033	p.R2524H
ENST00000544455	p.T2542M
ENST00000340811	p.D26N
ENST00000457016	p.N2593S
ENST00000357654	p.V271L
ENST00000304636	p.R271Q
ENST00000544455	p.K2729N
ENST00000457016	p.A2795T
ENST00000357654	p.A280G
ENST00000420246	p.R282W
ENST00000420246	p.R283H
ENST00000544455	p.R2842H
ENST00000544455	p.N289H
ENST00000544455	p.R2888C
ENST00000544455	p.A2951T
ENST00000261769	p.P30T
ENST00000544455	p.V2969M
ENST00000355481	p.E4505Q
ENST00000388922	p.H297R
ENST00000544455	p.R2973C
ENST00000357654	p.M297I
ENST00000544455	p.T3013I
ENST00000544455	p.V3079I
ENST00000544455	p.Y3098H
ENST00000544455	p.C315S
ENST00000544455	p.D3170G
ENST00000544455	p.K3196E
ENST00000544455	p.C3198R
ENST00000357033	p.F3228L
ENST00000544455	p.V3244I
ENST00000544455	p.S326R
ENST00000544455	p.A1170V
ENST00000357654	p.A1293V
ENST00000357654	p.A1843P
ENST00000357654	p.A221S
ENST00000544455	p.A2351G
ENST00000357654	p.A322P
ENST00000330062	p.A416V
ENST00000330062	p.A47V
ENST00000440486	p.A500T
ENST00000231790	p.A539D
ENST00000357654	p.N473S
ENST00000231790	p.A619P
ENST00000231790	p.A681T
ENST00000357654	p.A807S
ENST00000406134	p.S473L
ENST00000298552	p.R1097H
ENST00000357654	p.R1589H
ENST00000309486	p.R170Q
ENST00000357654	p.R1726G
ENST00000544455	p.R174H
ENST00000357654	p.R1758G
ENST00000357654	p.R1835Q
ENST00000544455	p.R2108C
ENST00000309486	p.R213G
ENST00000231790	p.R217C
ENST00000544455	p.R2336H
ENST00000298552	p.R246K
ENST00000357654	p.R252H
ENST00000231790	p.R265C
ENST00000231790	p.R265H
ENST00000544455	p.R2787H
ENST00000544455	p.R3052Q
ENST00000309486	p.R332Q
ENST00000261584	p.R365S
ENST00000388922	p.A482V
ENST00000231790	p.R474Q
ENST00000231790	p.R474W
ENST00000415913	p.R49C
ENST00000298552	p.R509Q
ENST00000406134	p.R638G
ENST00000281708	p.R658Q
ENST00000357654	p.F486L
ENST00000281708	p.R689Q
ENST00000231790	p.R69K
ENST00000309486	p.R728K
ENST00000357654	p.R756K
ENST00000357654	p.R762S
ENST00000357654	p.N1268S
ENST00000357654	p.N1647K
ENST00000357654	p.N1730S
ENST00000357654	p.N1819S
ENST00000544455	p.N1878K
ENST00000231790	p.N215S
ENST00000261584	p.N241D
ENST00000544455	p.N2447D
ENST00000544455	p.N277K
ENST00000269571	p.N319D
ENST00000544455	p.N3221T
ENST00000406134	p.N331D
ENST00000231790	p.N338S
ENST00000357654	p.N417S
ENST00000544455	p.N517S
ENST00000440486	p.N540S
ENST00000231790	p.N551T
ENST00000544455	p.N588D
ENST00000340107	p.T653P
ENST00000406134	p.N671Y
ENST00000544455	p.N72S
ENST00000309486	p.R496H
ENST00000257290	p.N870S
ENST00000357654	p.N877S
ENST00000544455	p.N900D
ENST00000357654	p.N909I
ENST00000357654	p.N913K
ENST00000257290	p.D1071N
ENST00000357654	p.D1152N
ENST00000261584	p.D134N
ENST00000357654	p.D1739E
ENST00000357654	p.D1778N
ENST00000357654	p.D1778G
ENST00000357654	p.D1778H
ENST00000357654	p.D1778Y
ENST00000357654	p.D1851E
ENST00000544455	p.D2238E
ENST00000544455	p.D2312V
ENST00000357654	p.D232N
ENST00000544455	p.D2965H
ENST00000380982	p.D324N
ENST00000269571	p.D326G
ENST00000309486	p.D411N
ENST00000309486	p.D411E
ENST00000231790	p.D41H
ENST00000357654	p.D420Y
ENST00000340107	p.A641T
ENST00000440486	p.D641G
ENST00000440486	p.D646Y
ENST00000406134	p.D748Y
ENST00000269571	p.K845T
ENST00000357654	p.C1372Y
ENST00000357654	p.C1787S
ENST00000406134	p.C199R
ENST00000440486	p.C582F
ENST00000406134	p.C697R
ENST00000357654	p.R504H
ENST00000231790	p.C77R
ENST00000544455	p.Q147R
ENST00000357654	p.Q1785H
ENST00000264033	p.Q249E
ENST00000544455	p.Q3036E
ENST00000544455	p.Q347R
ENST00000544455	p.Q609E
ENST00000231790	p.Q62K
ENST00000406134	p.Q645E
ENST00000231790	p.Q689R
ENST00000544455	p.Q893R
ENST00000261584	p.E1018D
ENST00000261584	p.E1083D
ENST00000357654	p.E1221A
ENST00000544455	p.E1397K
ENST00000357654	p.E1581D
ENST00000357654	p.E1682V
ENST00000544455	p.E1879K
ENST00000415913	p.E190K
ENST00000330062	p.E268D
ENST00000231790	p.E320D
ENST00000544455	p.K513R
ENST00000261584	p.E672Q
ENST00000357654	p.E736A
ENST00000357654	p.E827D
ENST00000257290	p.E996K
ENST00000231790	p.G101D
ENST00000231790	p.G101S
ENST00000298552	p.G1035S
ENST00000357654	p.G1205R
ENST00000330062	p.G137E
ENST00000357654	p.G1803A
ENST00000298552	p.G305R
ENST00000298552	p.G305W
ENST00000231790	p.G67R
ENST00000440486	p.G697C
ENST00000415913	p.G70D
ENST00000257290	p.G829R
ENST00000380982	p.G831E
ENST00000357654	p.G890R
ENST00000231790	p.G98S
ENST00000360985	p.R3539H
ENST00000415913	p.H133Q
ENST00000544455	p.H1561N
ENST00000357654	p.H1805P
ENST00000544455	p.H1966Y
ENST00000357654	p.H239R
ENST00000545968	p.A522T
ENST00000357654	p.H476R
ENST00000406134	p.H610N
ENST00000406134	p.H639Y
ENST00000440486	p.H643D
ENST00000357654	p.H662R
ENST00000309486	p.H816R
ENST00000406134	p.H839Q
ENST00000264033	p.H94Y
ENST00000357654	p.I1019V
ENST00000357654	p.I1275V
ENST00000415913	p.I130M
ENST00000357654	p.I1405V
ENST00000342988	p.I525V
ENST00000357654	p.I1529V
ENST00000357654	p.I15L
ENST00000231790	p.I216S
ENST00000261584	p.I309V
ENST00000357654	p.I31M
ENST00000281708	p.I347M
ENST00000309486	p.I42V
ENST00000309486	p.I456T
ENST00000340107	p.N538D
ENST00000357654	p.I571T
ENST00000357654	p.I917M
ENST00000544455	p.I982M
ENST00000415913	p.I99M
ENST00000357654	p.L1086S
ENST00000357654	p.L1764P
ENST00000357654	p.L1780P
ENST00000544455	p.L1965F
ENST00000357654	p.L204F
ENST00000544455	p.L2106P
ENST00000544455	p.L2396F
ENST00000231790	p.L260F
ENST00000261584	p.L337S
ENST00000269571	p.L49H
ENST00000231790	p.L549P
ENST00000231790	p.L585R
ENST00000231790	p.L607H
ENST00000357654	p.L87V
ENST00000357654	p.L965F
ENST00000261584	p.K1048R
ENST00000544455	p.K1434I
ENST00000357654	p.K1487R
ENST00000544455	p.K1678T
ENST00000261584	p.K18R
ENST00000544455	p.K2411T
ENST00000544455	p.K2950N
ENST00000309486	p.K408E
ENST00000309486	p.K503R
ENST00000544455	p.K745E
ENST00000309486	p.M1014V
ENST00000357654	p.M1628V
ENST00000357654	p.M1663K
ENST00000544455	p.C554W
ENST00000357654	p.M1783I
ENST00000357654	p.M1783L
ENST00000357654	p.M1783T
ENST00000544455	p.M2676T
ENST00000309486	p.M297L
ENST00000264033	p.M374V
ENST00000357654	p.M658I
ENST00000380982	p.M737I
ENST00000357654	p.F1695L
ENST00000380982	p.V557I
ENST00000231790	p.F656S
ENST00000257290	p.P130S
ENST00000357654	p.P1771L
ENST00000355710	p.L56M
ENST00000357654	p.P1776S
ENST00000357654	p.P1856S
ENST00000357654	p.P1856T
ENST00000544455	p.P2589H
ENST00000544455	p.P3063S
ENST00000544455	p.P3194Q
ENST00000357654	p.P334H
ENST00000415913	p.P33S
ENST00000357654	p.P346S
ENST00000264033	p.P428L
ENST00000544455	p.N56T
ENST00000309486	p.Q356R
